# Supplementary material for: Comparison of Clinical Outcomes of Robot-Assisted, Video-Assisted, and Open Esophagectomy for Esophageal Cancer: A Systematic Review and Meta-analysis
Source: PubMed Central journal article supplement (PMC8561331; doi:10.1001/jamanetworkopen.2021.29228), 2021-11-01
Supplement: jamanetwopen-e2129228-s001.pdf [file jamanetwopen-e2129228-s001.pdf]

## Supplemental Online Content

Mederos MA, de Virgilio MJ, Shenoy R, et al. Comparison of clinical outcomes of robot-assisted, video-assisted, and open esophagectomy for esophageal cancer: a systematic review and meta-analysis. *JAMA Netw Open*. 2021;4(11):e2129228. doi:10.1001/jamanetworkopen.2021.29228

**eMethods.** Search Strategy

**eTable 1.** Evidence Tables of Included Studies

**eTable 2.** Operative Techniques of Included Studies

**eTable 3.** Covariates for Propensity Matching in Studies Included in the Meta-analysis

**eTable 4.** Publication Bias

**eTable 5.** Risk of Bias Assessment

**eFigure 1.** Forest Plot of Intraoperative Outcomes

**eFigure 2.** Forest Plot of Short-term Outcomes

**eFigure 3.** Forest Plot Long-term Outcomes

**eReferences.**

This supplemental material has been provided by the authors to give readers additional information about their work.

## eMethods. Search Strategy

**DATABASE SEARCHED &  
TIME PERIOD COVERED:  
PUBMED – 2013-2020  
362 results**

### Search Strategy

(Randomized) OR ("control") OR (randomly) OR

(trial) OR (comparative) OR (prospective))AND

(Esophageal neoplasms[MESH terms] OR ("Esophageal neoplasm")) OR ("Esophageal cancer") OR ("Esophagus neoplasm") OR ("Oesophageal neoplasm"))OR ("Oesophageal cancer") OR ("Esophageal squamous cell carcinoma") OR (Esophageal squamous cell carcinoma[MESH terms]) OR (Esophageal adenocarcinoma) OR ("Esophagus cancer"))

AND

("minimally invasive" OR (Minimally-invasive)) OR (Laparoscopic) OR (Thoracoscopic) OR (Thoracolumbaroscop\*) OR (Laparothoracoscop\*) OR (Video-assisted) OR (video assisted) OR (Video-assisted thoracic surgery) OR (VATS) OR (Open) OR (Thoracotomy) OR (Laparotomy) OR (Transhiatal) OR (McKeown) OR ("Three-hole") OR (3-hole) OR (Ivor-Lewis) OR (Esophagectomy) OR (Oesophagectomy) OR (Esophagectomies) OR (Oesophagectomies) OR (Esophageal resection) OR (Oesophageal resection) OR (Trans-hiatal))

AND

"thoracic surgical procedures"[MESH Terms] OR (Robotic Surgical Procedures [MeSH terms]) OR

(Robotics) OR (Robot-assisted) OR (Robot))Filters: from 2013 – 2020

### **DATABASE SEARCHED & TIME PERIOD COVERED:**

**OVID MEDLINE & Epub Ahead of Print, In-Process & Other Non-Indexed Citations and Daily**

**1 result**

(randomized or "control" or randomly or

trial or comparative or prospective).af.

AND

exp Esophageal Neoplasms/ OR exp esophageal Squamous Cell Carcinoma/ OR

("esophageal neoplasm" or "esophageal cancer" or "esophagus neoplasm" or "oesophageal neoplasm" or "oesophageal cancer" or "esophageal squamous cell carcinoma" or "esophageal adenocarcinoma" or "esophagus cancer").mp.  
[mp=title, abstract, original title, name of substance word, subject heading word, floating sub-heading word, keyword heading word, organism supplementary concept word, protocol supplementary concept word, rare disease supplementary concept word, unique identifier, synonyms]

AND

("minimally invasive" or "minimally-invasive" or laparoscopic or thoracoscopic or thoracolumbaroscop\* or laparothoracoscop\* or "video-assisted" or "video assisted" or "video-assisted thoracic surgery" or "VATS" or open or thoracotomy or laparotomy or transhiatal or McKeown or "three-hole" or "3-hole" or "Ivor-Lewis" or esophagectomy or oesophagectomy or esophagectomies or oesophagectomies or "esophageal resection" or "oesophageal resection" or

"trans- hiatal").mp. [mp=title, abstract, original title, name of substance word, subject heading word, floating sub-heading word, keyword heading word, organism supplementary concept word, protocol supplementary concept word, rare disease supplementary concept word, unique identifier, synonyms]

AND

exp Thoracic Surgical Procedures/ OR exp/Robotic Surgical Procedures/ OR (robotics or "robot-assisted" or robot).mp. [mp=title, abstract, original title, name of substance word, subject heading word, floating sub-heading word, keyword heading word, organism supplementary concept word, protocol supplementary concept word, rare disease supplementary concept word, unique identifier, synonyms]

AND

Publication years 2013-2020

**DATABASE SEARCHED & TIME PERIOD COVERED:**

**EMBASE – 2013-2020**

**15 results**

randomized:ti,ab,kw OR control:ti,ab,kw OR randomly:ti,ab,kw OR trial:ti,ab,kw OR

comparative:ti,ab,kw OR prospective:ti,ab,kw AND

'esophageal neoplasms'/exp OR 'esophageal neoplasm':ti,ab,kw OR 'esophageal cancer':ti,ab,kw OR 'esophagus neoplasm':ti,ab,kw OR 'oesophageal neoplasm':ti,ab,kw OR 'oesophageal cancer':ti,ab,kw OR 'esophageal squamous cell carcinoma':ti,ab,kw OR 'esophageal squamous cell carcinoma'/exp OR 'esophageal adenocarcinoma':ti,ab,kw OR 'esophagus cancer':ti,ab,kw

AND

'minimally invasive':ti,ab,kw OR 'minimally-invasive':ti,ab,kw OR laparoscopic:ti,ab,kw OR thoracoscopic:ti,ab,kw OR thoracolaparoscop\*:ti,ab,kw OR laparothoracoscop\*:ti,ab,kw OR 'video-assisted':ti,ab,kw OR 'video assisted':ti,ab,kw OR 'video-assisted thoracic surgery':ti,ab,kw OR vats:ti,ab,kw OR open:ti,ab,kw OR thoracotomy:ti,ab,kw OR laparotomy:ti,ab,kw OR transhiatal:ti,ab,kw OR mckeown:ti,ab,kw OR 'three hole':ti,ab,kw OR '3-hole':ti,ab,kw OR 'ivor-lewis':ti,ab,kw OR esophagectomy:ti,ab,kw OR oesophagectomy:ti,ab,kw OR esophagectomies:ti,ab,kw OR oesophagectomies:ti,ab,kw OR 'esophageal resection':ti,ab,kw OR 'oesophageal resection':ti,ab,kw OR 'trans-hiatal':ti,ab,kw

AND

'thoracic surgical procedures' OR 'robotic surgical procedures' OR robotics:ti,ab,kw OR 'robot-

assisted':ti,ab,kw OR robot:ti,ab,kw AND

Publication years 2013-2020

**DATABASE SEARCHED & TIME PERIOD COVERED:**

**COCHRANE Reviews – 2013- 2020**

**12 results**

ID Search Hits

#1 MeSH descriptor: [Esophageal Neoplasms] explode all trees

#2 MeSH descriptor: [Esophageal Squamous Cell Carcinoma] explode all trees

#3 (Randomized OR control OR random OR trial OR comparative OR prospective):ti,ab,kw

#4 ("Esophageal neoplasm" OR "Esophageal cancer" OR "Esophagus neoplasm" OR "Oesophageal neoplasm" OR "Oesophageal cancer" OR "Esophagealsquamous cell carcinoma" OR "Esophageal adenocarcinoma" OR "Esophagus cancer"):ti,ab,kw

#5 #1 OR #2 OR #4  
#6 ("minimally invasive" OR "Minimally-invasive" OR Laparoscopic OR Thoracoscopic OR Thoracolumboscopy\* OR Laparothoracoscopy\* OR "Video- assisted" OR "video assisted" OR "Video-assisted thoracic surgery" OR VATS OR Open OR Thoracotomy OR Laparotomy OR Transhiatal OR McKeown OR "Three-hole" OR "3-hole" OR "Ivor-Lewis" OR Esophagectomy OR Oesophagectomy OR Esophagectomies OR Oesophagectomies OR "Esophageal resection" OR "Oesophageal resection" OR "Trans-hiatal");ti,ab,kw  
#7 MeSH descriptor:  
[Thoracic Surgical Procedures]  
explode all trees#8 MeSH  
descriptor: [Robotic Surgical  
Procedures] explode all trees  
#9 (robotics OR "robot-assisted" OR  
robot):ti,ab,kw (Word variations have been searched)#10  
#7 OR #8 OR #9  
#  
1  
1  
#3 AND #5 AND #6 AND #10AND

Publication years Jan 2013- Dec2020

**eTable 1. Evidence Tables of Included Studies**

**Patient Characteristics and intraoperative outcomes**

| <b>Author</b><br><b>Year</b><br><b>Large Database (y/n)</b><br><b>Study Design</b><br><b>Propensity matching (y/n)</b><br><b>#Institutions/Surgeons</b><br><b>US (y/n)</b><br><b>VA (y/n)</b> | <b>Comparisons (e.g., open vs robot Ivor-Lewis; VATS vs robot McKeown, etc.)</b> | <b>Patient &amp; Tumor Characteristics Preop</b><br>N<br>Age, mean yr (SD) Male, % Race/Ethnicity<br>NH-White, %NH-Black, %NH-Asian, %Hispanic, %<br>BMI, mean (SD)<br>ASA class, mean (SD) Comorbidity index (CCI):<br>Smoking current/former/unspecifiedDM<br>Albumin<br>Tumor Location (%) Stage<br>Neoadjuvant therapy (%) <b>Squamous (%) Adenocarcinoma (%)</b> |              |                                          | <b>Intraoperative Outcomes</b><br>OR, time, min (SD) EBL, mL (SD)<br>Transfusions (%) Conversion (%)<br>Major Complications, N (%)<br>Lymph node harvest, N (std dev/IQR) Margins positive (%) |              |                                          |
|-----------------------------------------------------------------------------------------------------------------------------------------------------------------------------------------------|----------------------------------------------------------------------------------|-----------------------------------------------------------------------------------------------------------------------------------------------------------------------------------------------------------------------------------------------------------------------------------------------------------------------------------------------------------------------|--------------|------------------------------------------|------------------------------------------------------------------------------------------------------------------------------------------------------------------------------------------------|--------------|------------------------------------------|
|                                                                                                                                                                                               |                                                                                  | <b>Open</b>                                                                                                                                                                                                                                                                                                                                                           | <b>Robot</b> | <b>Other minimally-invasive approach</b> | <b>Open</b>                                                                                                                                                                                    | <b>Robot</b> | <b>Other minimally-invasive approach</b> |
|                                                                                                                                                                                               |                                                                                  |                                                                                                                                                                                                                                                                                                                                                                       |              |                                          |                                                                                                                                                                                                |              |                                          |

|                                                                         |                                                                                                                                                  |  |                                                                                                                                                                |                                                                                                                                                                 |  |                                                                                                                                                                      |                                                                                                                                                                        |
|-------------------------------------------------------------------------|--------------------------------------------------------------------------------------------------------------------------------------------------|--|----------------------------------------------------------------------------------------------------------------------------------------------------------------|-----------------------------------------------------------------------------------------------------------------------------------------------------------------|--|----------------------------------------------------------------------------------------------------------------------------------------------------------------------|------------------------------------------------------------------------------------------------------------------------------------------------------------------------|
| Chao, 2018 <sup>1</sup> N<br>RetrospectiveY<br>Single institutionN<br>N | McKeown<br>(trans thoracic<br>robot<br>+ laparoscopic)<br>vsMcKeown<br>(VATS<br>+ laparoscopic).<br>Stapled cervical<br>anastomosis for<br>both. |  | Matched<br>N=34<br>Age: 56.76<br>(8.39)<br>Male: 32<br>(94.1)BMI:<br>NR ASA: NR<br>Comorbidity<br>index: 2.88<br>(1.27)<br>Smoking:<br>NRDM: NR<br>Albumin: NR | Matched<br>N=34<br>Age: 53.47<br>(8.69)<br>Male: 33<br>(97.1)BMI:<br>NR ASA: NR<br>Comorbidity<br>index: 2.88<br>(1.27)<br>Smoking: NR<br>DM: NR<br>Albumin: NR |  | Matched<br>Thoracic<br>ORtime:<br>231.15<br>(42.84)<br>EBL: 92.06<br>(99)<br>Transfusions<br>:3 (8.8)<br>Conversions:<br>0<br>(0)<br>LN harvest:<br>37.18<br>(18.25) | Matched<br>Thoracic<br>ORtime:<br>200.15<br>(103.48)<br>EBL: 102.65<br>(96.67)<br>Transfusions:<br>2<br>(5.9)<br>Conversions: 0<br>(0)<br>LN harvest:<br>36.24 (12.95) |
|-------------------------------------------------------------------------|--------------------------------------------------------------------------------------------------------------------------------------------------|--|----------------------------------------------------------------------------------------------------------------------------------------------------------------|-----------------------------------------------------------------------------------------------------------------------------------------------------------------|--|----------------------------------------------------------------------------------------------------------------------------------------------------------------------|------------------------------------------------------------------------------------------------------------------------------------------------------------------------|

|  |  |  |                                                                                                                                                                                                  |                                                                                                                                                                                                 |  |                             |                              |
|--|--|--|--------------------------------------------------------------------------------------------------------------------------------------------------------------------------------------------------|-------------------------------------------------------------------------------------------------------------------------------------------------------------------------------------------------|--|-----------------------------|------------------------------|
|  |  |  | Tumor<br>location:Upper:<br>10 (29.4)<br>Mid: 15 (44.1)<br>Lower: 9 (26.5)<br>Stage:<br>I/II: 16 (47.1)<br>III: 18<br>(52.9)<br>Neoadjuvan<br>ttreatment:<br>17<br>(50)<br>Squamous: 34<br>(100) | Tumor location:<br>Upper: 10 (29.4)<br>Mid: 19 (55.9)<br>Lower: 5 (14.7)<br>Stage:<br>I/II: 16 (47.1)<br>III: 18 (52.9)<br>Neoadjuva<br>nt<br>treatment:<br>17<br>(50)<br>Squamous: 34<br>(100) |  | Margins:<br>R0: 34<br>(100) | Margins:<br>R): 33<br>(97.1) |
|--|--|--|--------------------------------------------------------------------------------------------------------------------------------------------------------------------------------------------------|-------------------------------------------------------------------------------------------------------------------------------------------------------------------------------------------------|--|-----------------------------|------------------------------|

|                                                                                          |                                                    |  |                                                                                                                                                                                                                                                                                                                                                                                                 |                                                                                                                                                                                                                                                                                                                                                                                                    |  |                                                                                                                                      |                                                                                                                                       |
|------------------------------------------------------------------------------------------|----------------------------------------------------|--|-------------------------------------------------------------------------------------------------------------------------------------------------------------------------------------------------------------------------------------------------------------------------------------------------------------------------------------------------------------------------------------------------|----------------------------------------------------------------------------------------------------------------------------------------------------------------------------------------------------------------------------------------------------------------------------------------------------------------------------------------------------------------------------------------------------|--|--------------------------------------------------------------------------------------------------------------------------------------|---------------------------------------------------------------------------------------------------------------------------------------|
| Chen, 2019 <sup>2</sup><br>Retrospective<br>Y<br>1 surgical team/1 institution<br>N<br>N | Robotic McKeownvs MIE (laparoscopy & VATS) McKeown |  | Matche<br>dN: 54<br>Age: 61.8 (9.4)<br>Male: 41 (75.9)<br>BMI: 22.7 (2.9)<br>ASA: NR<br>Comorbidity index: NR<br>Smoking: 25 (46.3)<br>DM: 1 (1.9)<br>Albumin: NR<br>NRcT stage:<br>1: 14 (25.9)<br>2: 7 (13)<br>3: 33 (61.1)<br>4a: 0<br>cN stage:<br>0: 30 (55.6)<br>1: 11 (20.4)<br>2: 11 (20.4)<br>3: 2 (3.7)<br>Neoadjuvant chemoradiation: 14 (25.9)<br>Squamous cell carcinoma: 54 (100) | Match<br>edN:<br>54<br>Age: 61.8 (8.3)<br>Male: 43 (79.6)<br>BMI: 23 (2.7)<br>ASA: NR<br>Comorbidity index: NR<br>Smoking: 27 (50)<br>DM: 1 (1.9)<br>Albumin: NR<br>cT stage:<br>1: 15 (27.8)<br>2: 7 (13)<br>3: 31 (57.4)<br>4a: 1 (1.9)<br>cN stage:<br>0: 22 (40.7)<br>1: 14 (25.9)<br>2: 16 (29.6)<br>3: 2 (3.7)<br>Neoadjuvant chemoradiation: 17 (31.5)<br>Squamous cell carcinoma: 54 (100) |  | Matche<br>d OR<br>time:<br>187.2 (34)<br>EBL: 118.9 (77.4)<br>Conversion: NR<br>LN harvest: 25.4 (7.5)<br>Negative margins: 54 (100) | Matched<br>OR time:<br>193.4 (27.1)<br>EBL: 116.5 (85.9)<br>Conversion: NR<br>NRLN harvest: 24.7 (11.2)<br>Negative margins: 54 (100) |
|------------------------------------------------------------------------------------------|----------------------------------------------------|--|-------------------------------------------------------------------------------------------------------------------------------------------------------------------------------------------------------------------------------------------------------------------------------------------------------------------------------------------------------------------------------------------------|----------------------------------------------------------------------------------------------------------------------------------------------------------------------------------------------------------------------------------------------------------------------------------------------------------------------------------------------------------------------------------------------------|--|--------------------------------------------------------------------------------------------------------------------------------------|---------------------------------------------------------------------------------------------------------------------------------------|

|                                                                                                                        |                                                                                               |                                                                                                                                                                                                       |                                                                                                                                                                                                                                                                                                                                                                                                                              |                                                                                                                                                                                                                                                                                                                                                                                                                                              |                                                                           |                                                                                                                                                                                                                                                                                                                                                     |                                                                                                                                                                                                                                                                                                                                             |
|------------------------------------------------------------------------------------------------------------------------|-----------------------------------------------------------------------------------------------|-------------------------------------------------------------------------------------------------------------------------------------------------------------------------------------------------------|------------------------------------------------------------------------------------------------------------------------------------------------------------------------------------------------------------------------------------------------------------------------------------------------------------------------------------------------------------------------------------------------------------------------------|----------------------------------------------------------------------------------------------------------------------------------------------------------------------------------------------------------------------------------------------------------------------------------------------------------------------------------------------------------------------------------------------------------------------------------------------|---------------------------------------------------------------------------|-----------------------------------------------------------------------------------------------------------------------------------------------------------------------------------------------------------------------------------------------------------------------------------------------------------------------------------------------------|---------------------------------------------------------------------------------------------------------------------------------------------------------------------------------------------------------------------------------------------------------------------------------------------------------------------------------------------|
| <p>Deng, 2018<sup>3</sup><br/>N<br/>Retrospective<br/>(prospective inclusion)Y<br/>1 institution/2 surgeonsN<br/>N</p> | <p>Robot McKeown (abd<br/>and thoracic portions)<br/>vs<br/>thoracolaroscopic<br/>McKeown</p> |                                                                                                                                                                                                       | <p>Matched<br/>N: 52<br/>Age: 61 (7.2)<br/>Male: 40 (76.9)<br/>Height: 163.4<br/>(6.8)<br/>Weight: 58.7 (8)<br/>ASA: NR<br/>Major comorbidity:<br/>12<br/>(23.1)<br/>Smoking: NR<br/>DM: 3 (5.8)<br/>Albumin: NR<br/>Tumor location:<br/>Upper: 10 (19.2)<br/>Mid: 33 (63.5)<br/>Lower: 9 (17.3)<br/>Esophagogastric:0<br/>Clinical Stage:I:<br/>12 (23.1)<br/>II: 36 (69.2)<br/>III: 4 (7.7)<br/>Squamous: 52<br/>(100)</p> | <p>Matched<br/>N: 52<br/>Age: 60.9 (9.2)<br/>Male: 39 (75)<br/>Height: 163.5<br/>(5.5)<br/>Weight: 59.9<br/>(8.5)<br/>ASA: NR<br/>Major comorbidity:<br/>14<br/>(26.9)<br/>Smoking: NR<br/>DM: 2 (3.8)<br/>Albumin: NR<br/>Tumor location:<br/>Upper: 7 (13.5)<br/>Mid: 30 (57.7)<br/>Lower: 14 (26.9)<br/>Esophagogastric:1<br/>(1.9)<br/>Clinical Stage:I:<br/>9 (17.3)<br/>II: 35 (67.3)<br/>III: 8 (15.4)<br/>Squamous: 52<br/>(100)</p> |                                                                           | <p>Matched<br/>OR time: 353<br/>(71.8)<br/>Thoracic time:<br/>130.6 (28.7)<br/>Abdominal<br/>time: 94.5<br/>(21.6)<br/>EBL: 96.3<br/>(53.4)<br/>LN harvest:<br/>21.5 (8.4)<br/>Mediastinal<br/>LN harvest:<br/>11.8 (5.1)<br/>Abdominal LN<br/>harvest: 9.7<br/>(6.4)<br/>R RLN LN<br/>harvest: 2.4<br/>(1.9)<br/>L RLN LN<br/>harvest: 1 (1.8)</p> | <p>Matched OR<br/>time: 274.2<br/>(51.7)<br/>Thoracic time:<br/>121.7 (24.6)<br/>Abdominal time:<br/>87.5 (20.9)<br/>EBL: 127.5<br/>(127.8)<br/>LN harvest: 17.3<br/>(6.5)<br/>Mediastinal LN<br/>harvest: 10.1<br/>(4.3)<br/>Abdominal LN<br/>harvest: 7.3 (5.1)R<br/>RLN LN<br/>harvest: 1.9 (2.2)L<br/>RLN LN<br/>harvest: 0.4 (0.8)</p> |
| <p>Espinoza-Mercado,2019<sup>4</sup><br/>Y (NCDB 2010-2015)<br/>Restrospective<br/>Y<br/>1,500+<br/>Y<br/>N</p>        | <p>Robot-assisted vs<br/>minimally invasive<br/>vs open</p>                                   | <p>UnmatchedN:<br/>3,542<br/>Age (med, IQR):<br/>63 (56-69)<br/>Male: 2,995<br/>(84.6)<br/>White: 3,308<br/>(93.4)<br/>CCI zero: 2,434<br/>(68.7)<br/>CCI 1: 892 (25.2)<br/>CCI ≥2: 216<br/>(6.1)</p> | <p>Unmatched<br/>N: 433<br/>Age (med, IQR):<br/>64 (57-70)<br/>Male: 371 (85.7)<br/>White: 398 (91.9)<br/>CCI zero: 311<br/>(71.8)<br/>CCI 1: 95 (21.9)<br/>CCI ≥2: 24 (5.9)<br/>Tumor location:<br/>Mid: 53 (12.2)<br/>Lower: 380</p>                                                                                                                                                                                       | <p>Unmatched<br/>N: 1,578<br/>Age (med, IQR):<br/>63 (57-69)<br/>Male: 1,348<br/>(85.4)<br/>White: 1,490<br/>(94.4)<br/>CCI zero: 1,088<br/>(68.9)<br/>CCI 1: 384<br/>(24.3)<br/>CCI &gt;2: 106</p>                                                                                                                                                                                                                                          | <p>Margin: R0:<br/>3,318 (94)<br/>LN harvest(med,<br/>IQR): 13 (8-20)</p> | <p>Margin: R0:<br/>408 (94.9)<br/>LN<br/>harvest(med,<br/>IQR): 17 (11-<br/>24)</p>                                                                                                                                                                                                                                                                 | <p>Margin: R0:<br/>1,474 (94.1)<br/>LN harvest(med,<br/>IQR): 15 (9-22)</p>                                                                                                                                                                                                                                                                 |



|  |  |                                                                                                                                                                                                                                                                                                                                                                                                                                                                                                                                                                                                                                                        |                                                                                                                                                                                                                                                                                                                                                                                                                                                                                                                                                                                                   |                                                                                                                                                                                                                                                                                                                                                                                                                                                                                                                                                                                                                                 |  |  |  |
|--|--|--------------------------------------------------------------------------------------------------------------------------------------------------------------------------------------------------------------------------------------------------------------------------------------------------------------------------------------------------------------------------------------------------------------------------------------------------------------------------------------------------------------------------------------------------------------------------------------------------------------------------------------------------------|---------------------------------------------------------------------------------------------------------------------------------------------------------------------------------------------------------------------------------------------------------------------------------------------------------------------------------------------------------------------------------------------------------------------------------------------------------------------------------------------------------------------------------------------------------------------------------------------------|---------------------------------------------------------------------------------------------------------------------------------------------------------------------------------------------------------------------------------------------------------------------------------------------------------------------------------------------------------------------------------------------------------------------------------------------------------------------------------------------------------------------------------------------------------------------------------------------------------------------------------|--|--|--|
|  |  | <p>Tumor location:<br/>Mid: 422 (11.9)<br/>Lower: 3,120 (88.1)<br/>cT Stage: T1: 719 (20.5)<br/>T2: 761 (21.7)<br/>T3: 1,895 (54.1)<br/>cN stage: N0: 1,785 (50.8)<br/>N1: 1,329 (37.8)<br/>N2: 33 (9.5)<br/>Grade:<br/>Well-differentiated: 222 (7.1)<br/>Moderately-differentiated: 1,374 (43.9)<br/>Poorly-differentiated: 1,532 (49)<br/>pT stage: T1: 1,113 (35.8)<br/>T2: 633 (19.2)<br/>T3: 1,264 (40.6)<br/>pN stage: N0: 2,186 (64.4)<br/>N1: 734 (21.6)<br/>N2: 326 (9.6)<br/>p Stage: 0: 252 (7.1)<br/>1: 1,140 (32.2)<br/>2: 1,153 (32.6)<br/>3: 997 (28.1)<br/>Neoadjuvant chemoradiation: 2,230 (63.6)<br/>Neoadjuvant chemotherapy:</p> | <p>(87.8)<br/>cT Stage: T1: 72 (16.7)<br/>T2: 79 (18.4)<br/>T3: 263 (61.2)<br/>cN stage: N0: 214 (49.4)<br/>N1: 171 (39.5)<br/>N2: 40 (9.2)<br/>Grade:<br/>Well-differentiated: 38 (9.7)<br/>Moderately-differentiated: 175 (44.6)<br/>Poorly-differentiated: 179 (45.7)<br/>pT stage: T1: 156 (37.9)<br/>T2: 83 (20.1)<br/>T3: 136 (33)<br/>pN stage: N0: 275 (64.9)<br/>N1: 99 (23.3)<br/>N2: 33 (7.8)<br/>p Stage: 0: 40 (10.1)<br/>1: 143 (35.9)<br/>2: 137 (34.4)<br/>3: 78 (19.6)<br/>Neoadjuvant chemoradiation: 290 (67.1)<br/>Neoadjuvant chemotherapy: 21 (4.9)<br/>Adenocarcinoma:</p> | <p>(6.8)<br/>Tumor location:<br/>Mid: 184 (11.7)<br/>Lower: 1,394 (88.3)<br/>cT Stage: T1: 346 (22.1)<br/>T2: 341 (21.8)<br/>T3: 826 (52.8)<br/>cN stage: N0: 821 (52.3)<br/>N1: 591 (37.6)<br/>N2: 133 (8.5)<br/>Grade:<br/>Well-differentiated: 145 (10.3)<br/>Moderately-differentiated: 593 (41.9)<br/>Poorly-differentiated: 676 (47.8)<br/>pT stage: T1: 569 (38.7)<br/>T2: 279 (19)<br/>T3: 511 (34.8)<br/>pN stage: N0: 987 (65.1)<br/>N1: 307 (20.3)<br/>N2: 163 (10.9)<br/>p Stage: 0: 123 (8.6)<br/>1: 514 (36.1)<br/>2: 475 (33.4)<br/>3: 310 (21.8)<br/>Neoadjuvant chemoradiation: 981 (62.6)<br/>Neoadjuvant</p> |  |  |  |
|--|--|--------------------------------------------------------------------------------------------------------------------------------------------------------------------------------------------------------------------------------------------------------------------------------------------------------------------------------------------------------------------------------------------------------------------------------------------------------------------------------------------------------------------------------------------------------------------------------------------------------------------------------------------------------|---------------------------------------------------------------------------------------------------------------------------------------------------------------------------------------------------------------------------------------------------------------------------------------------------------------------------------------------------------------------------------------------------------------------------------------------------------------------------------------------------------------------------------------------------------------------------------------------------|---------------------------------------------------------------------------------------------------------------------------------------------------------------------------------------------------------------------------------------------------------------------------------------------------------------------------------------------------------------------------------------------------------------------------------------------------------------------------------------------------------------------------------------------------------------------------------------------------------------------------------|--|--|--|

|  |  |                                                                                                                                                                                                                                                                                                                                                                                                                                                                                                                         |                                                                                                                                                                                                                                                                                                                                                                                                                                                                                                                                          |                                                                                                                                     |                                                                                                             |                                                                                                                  |                                                                                                              |
|--|--|-------------------------------------------------------------------------------------------------------------------------------------------------------------------------------------------------------------------------------------------------------------------------------------------------------------------------------------------------------------------------------------------------------------------------------------------------------------------------------------------------------------------------|------------------------------------------------------------------------------------------------------------------------------------------------------------------------------------------------------------------------------------------------------------------------------------------------------------------------------------------------------------------------------------------------------------------------------------------------------------------------------------------------------------------------------------------|-------------------------------------------------------------------------------------------------------------------------------------|-------------------------------------------------------------------------------------------------------------|------------------------------------------------------------------------------------------------------------------|--------------------------------------------------------------------------------------------------------------|
|  |  | 215 (6.1)<br>Adenocarcinoma:<br>3,022 (85.3)<br>SCC: 520 (14.7)                                                                                                                                                                                                                                                                                                                                                                                                                                                         | 363 (83.8)<br>SCC: 70 (16.2)                                                                                                                                                                                                                                                                                                                                                                                                                                                                                                             | chemotherapy:89<br>(5.7)<br>Adenocarcinoma:<br>3,022 (85.3)<br>SCC: 520 (14.7)                                                      |                                                                                                             |                                                                                                                  |                                                                                                              |
|  |  | Matched<br>N: 406<br>Age (med, IQR):<br>64 (56-68)<br>Male: 354 (87.2)<br>White: 382<br>(94.1)<br>CCI zero: 280<br>(69)<br>Tumor location:<br>Lower: 346<br>(85.2)<br>Clinical Stage:0:<br>4 (1)<br>I: 113 (27.8)<br>II: 120 (29.6)<br>III: 169 (41.6)<br>cT Stage:<br>Tis: 4 (1)<br>T1: 93 (22.9)<br>T2: 87 (21.4)<br>T3: 211 (52)<br>T4: 8 (2)<br>cN stage: N0:<br>201 (51)<br>N1: 143 (35.2)<br>N2: 47 (11.6)<br>N3: 6 (1.5)<br>Grade:<br>Poorly-<br>differentiated:<br>173 (42.6)<br>Neoadjuvant<br>chemoradiation: | Matched<br>N: 406<br>Age: 64 (57-70)<br>White: 374 (92.1)<br>Male: 349 (86)<br>CCI zero: 296<br>(72.9)<br>Tumor location:<br>Lower: 357<br>(87.9)<br>Clinical Stage:0:<br>6 (1.5)<br>I: 89 (21.9)<br>II: 138 (34)<br>III: 173 (42.6)<br>cT Stage:<br>Tis: 5 (1.2)<br>T1: 66 (16.3)<br>T2: 74 (18.2)<br>T3: 248 (61.1)<br>T4: 10 (2.5)<br>cN stage: N0:<br>207 (49.5)<br>N1: 160 (39.4)<br>N2: 38 (9.4)<br>N3: 7 (1.7)<br>Grade:<br>Poorly-<br>differentiated:<br>172 (42.4)<br>Neoadjuvant<br>chemoradiation:<br>276 (68)<br>Neoadjuvant | MIE vs RAMIE<br>matched<br>patient/pre-op<br>characteristics not<br>reported. The<br>outcomes for<br>matched are<br>shown, however. | OR time: NR<br>EBL: NR<br>Conversion: NR<br>Margin:<br>R0: 374 (92.1)<br>LN harvest(med,<br>IQR): 13 (7-21) | OR time: NR<br>EBL: NR<br>Conversion:NR<br>Margin:<br>R0: 383 (95)<br>LN<br>harvest(med,<br>IQR): 17 (11-<br>24) | OR time: NR<br>EBL: NR<br>Conversion: NR<br>Margin:<br>R0: 388 (96.3)<br>LN harvest(med,<br>IQR): 16 (10-22) |

|                                                                                                                     |                                                         |                                                                                                                                                                                                                                                                                                                                                                                                                                                                          |                                                                                                                                                                                                                                                                                                                                                                                                                                                                                     |                                                                                                                                                                                                                                                                                                                                                                                                                                                                                              |                                                                                                                                                                                                                                                                                                                                                                                                  |                                                                                                                                                                                                                                                                                                                                                                                                                   |                                                                                                                                                                                                                                                                                                                                                                                                             |
|---------------------------------------------------------------------------------------------------------------------|---------------------------------------------------------|--------------------------------------------------------------------------------------------------------------------------------------------------------------------------------------------------------------------------------------------------------------------------------------------------------------------------------------------------------------------------------------------------------------------------------------------------------------------------|-------------------------------------------------------------------------------------------------------------------------------------------------------------------------------------------------------------------------------------------------------------------------------------------------------------------------------------------------------------------------------------------------------------------------------------------------------------------------------------|----------------------------------------------------------------------------------------------------------------------------------------------------------------------------------------------------------------------------------------------------------------------------------------------------------------------------------------------------------------------------------------------------------------------------------------------------------------------------------------------|--------------------------------------------------------------------------------------------------------------------------------------------------------------------------------------------------------------------------------------------------------------------------------------------------------------------------------------------------------------------------------------------------|-------------------------------------------------------------------------------------------------------------------------------------------------------------------------------------------------------------------------------------------------------------------------------------------------------------------------------------------------------------------------------------------------------------------|-------------------------------------------------------------------------------------------------------------------------------------------------------------------------------------------------------------------------------------------------------------------------------------------------------------------------------------------------------------------------------------------------------------|
|                                                                                                                     |                                                         | 252 (62.1)<br>Neoadjuvant<br>chemotherapy:<br>18 (4.4)<br>Adenocarcinoma:<br>341 (84)                                                                                                                                                                                                                                                                                                                                                                                    | chemotherapy:17<br>(4.2)<br>Adenocarcinoma:<br>344 (84.7)                                                                                                                                                                                                                                                                                                                                                                                                                           |                                                                                                                                                                                                                                                                                                                                                                                                                                                                                              |                                                                                                                                                                                                                                                                                                                                                                                                  |                                                                                                                                                                                                                                                                                                                                                                                                                   |                                                                                                                                                                                                                                                                                                                                                                                                             |
| Gong, 2020 <sup>5</sup><br>N<br>RetrospectiveN<br>1 institution/4 surgeons<br>(only 2 performed<br>robot)<br>N<br>N | Open vs total robotic<br>vs<br>thoracoscopic<br>McKeown | N: 77<br>Age: 59.77<br>Race: NR Male:<br>74 (96.1)BMI:<br>NR<br>CCI:<br>0: 5 (6.5)<br>1: 28 (36.4)<br>2: 33 (42.9)<br>3: 11 (14.3)<br>4: 0<br>Smoking: NR<br>DM: NR<br>Albumin: NR<br>Tumor location:<br>Upper: 8 (10.39)<br>Mid: 37 (48.05)<br>Lower: 32<br>(41.56)<br>Clinical Stage:I:<br>2 (2.6)<br>II: 21 (27.27)<br>III: 47 (61.04)<br>IVA: 7 (9.09)<br>Neoadjuvant<br>therapy: 40<br>(51.95)<br>Squamous cell<br>carcinoma: 74<br>(96.1)<br>Adenocarcinoma:<br>NR | N: 91<br>Age: 60.04<br>Race: NR<br>Male: 78 (85.71)<br>BMI: NR<br>CCI:<br>0: 8 (8.79)<br>1: 25 (27.47)<br>2: 40 (44)<br>3: 14 (15.38)<br>4: 4 (4.4)<br>Smoking: NR<br>DM: NR<br>Albumin: NR<br>Tumor location:<br>Upper: 7 (7.69)<br>Mid: 31 (34.07)<br>Lower: 53<br>(58.24)<br>Clinical Stage:I:<br>15 (16.48)<br>II: 38 (41.76)<br>III: 34 (37.36)<br>IVA: 4 (4.4)<br>Neoadjuvant<br>therapy: 20<br>(21.98)<br>Squamous cell<br>carcinoma: 86<br>(94.51)<br>Adenocarcinoma:<br>NR | N: 144<br>Age: 60.22<br>Race: NR<br>Male: 130<br>(90.28)<br>BMI: NR<br>CCI:<br>0: 10 (6.94)<br>1: 44 (30.56)<br>2: 64 (4.44)<br>3: 22 (15.28)<br>4: 4 (2.78)<br>Smoking: NR<br>DM: NR<br>Albumin: NR<br>Tumor location:<br>Upper: 4 (2.78)<br>Mid: 72 (50)<br>Lower: 68<br>(47.22)<br>Clinical Stage:I:<br>20 (13.89)<br>II: 59 (40.97)<br>III: 47 (32.64)<br>IVA: 18 (12.5)<br>Neoadjuvant<br>therapy: 28<br>(19.44)<br>Squamous cell<br>carcinoma: 134<br>(93.06)<br>Adenocarcinoma:<br>NR | OR time: 299.38<br>(57.98)<br>EBL: 289.61<br>(355)<br>Total LN harvest:<br>24.09 (10.77)<br>Cervical LN:<br>1.25 (4.3)<br>Upper mediastinum<br>LN:4.33 (3.61)<br>Middle<br>mediastinum LN:<br>7.81 (4.89)<br>Lower<br>mediastinum:<br>1.77 (2.32)<br>Abdominal LN:8.94<br>(5.55)<br>Right RLN LN:2.14<br>(1.95)<br>Left RLN LN: 29<br>(37.66)<br>Margins positive:<br>R0 resection: 75<br>(97.4) | OR time:<br>318.02 (53.9)<br>EBL: 215.49<br>(125.4)<br>Total LN<br>harvest: 22.84<br>(8.37)<br>Cervical LN:<br>0.29 (1.99)<br>Upper<br>mediastinum<br>LN: 6.22 (4.1)<br>Middle<br>mediastinum<br>LN: 6.34<br>(3.74)<br>Lower<br>mediastinum:<br>1.9 (1.87)<br>AbdominalLN:<br>8.13<br>(5.53)<br>Right RLN<br>LN: 2.74<br>(2.03) Left<br>RLN LN:<br>2.35 (3.0)<br>Margins<br>positive:<br>R0 resection:91<br>(100) | OR time: 321.13<br>(57.21)<br>EBL: 200.49<br>(59.54)<br>Total LN harvest:<br>23.07<br>(10.18)<br>Cervical LN:0.42<br>(1.7)<br>Upper<br>mediastinum LN:<br>5.63 (3.88)<br>Middle<br>mediastinum LN:<br>7.2 (4.69)<br>Lower<br>mediastinum:<br>1.74 (2.18)<br>Abdominal LN:<br>8.1 (4.77)<br>Right RLN LN:<br>2.57 (2.08)<br>Left RLN LN:<br>1.95 (2.67)<br>Margins<br>positive:<br>R0 resection:144<br>(100) |

|                                                                                    |                                                                                                                               |  |                                                                                                                                                                                                                                                                                                                                                                                                                                                                                                                                                                                            |                                                                                                                                                                                                                                                                                                                                                                                                                                                                                                                                                                                            |  |                                                                                   |                                                                                   |
|------------------------------------------------------------------------------------|-------------------------------------------------------------------------------------------------------------------------------|--|--------------------------------------------------------------------------------------------------------------------------------------------------------------------------------------------------------------------------------------------------------------------------------------------------------------------------------------------------------------------------------------------------------------------------------------------------------------------------------------------------------------------------------------------------------------------------------------------|--------------------------------------------------------------------------------------------------------------------------------------------------------------------------------------------------------------------------------------------------------------------------------------------------------------------------------------------------------------------------------------------------------------------------------------------------------------------------------------------------------------------------------------------------------------------------------------------|--|-----------------------------------------------------------------------------------|-----------------------------------------------------------------------------------|
| <p>He, 2018<sup>6</sup><br/>N<br/>RetrospectiveY<br/>Single institutionN<br/>N</p> | <p>McKeown RAMIE<br/>(abdominal and<br/>thoracic portions) vs<br/>VAMIE (MIE<br/>for thoracic and<br/>abdominal portions)</p> |  | <p>N: 27<br/>Age: 61 (8)<br/>Male: 20 (74.1)<br/>BMI: 21.5 (2.7)<br/>FEV1%: 94.6<br/>(13.8)<br/>CCI:<br/>1: 1 (3.7)<br/>2: 10 (37)<br/>3: 13 (48.1)<br/>4: 3 (11.1)<br/>Tumor location:<br/>Upper: 1 (3.7)<br/>Mid: 18 (66.6)<br/>Lower: 8 (29.6)pT<br/>stage:<br/>T1: 4 (14.8)<br/>T2: 13 (48.1)<br/>T3: 10 (37)<br/>pN stage: N0:<br/>13 (48.1)<br/>N1: 10 (37)<br/>N2: 3 (11.1)<br/>N3: 1 (3.7)<br/>Tumor grade:<br/>Well-<br/>differentiated: 2<br/>(7.4)<br/>Moderately<br/>differentiated: 19<br/>(70.4)<br/>Poorly<br/>differentiated: 6<br/>(22.2)<br/>Squamous: 23<br/>(85.2)</p> | <p>N: 27<br/>Age: 61.6 (9.8)<br/>Male: 20 (74.1)<br/>BMI: 21.9 (2.8)<br/>FEV1%: 92.9<br/>(23)<br/>CCI:<br/>1: 4 (14.8)<br/>2: 8 (29.6)<br/>3: 11 (40.7)<br/>4: 4 (14.8)<br/>Tumor location:<br/>Upper: 3 (11.1)<br/>Mid: 15 (55.6)<br/>Lower: 9 (33.3)<br/>pT stage: T1:<br/>1 (3.7)<br/>T2: 13 (48.1)<br/>T3: 13 (48.1)<br/>pN stage: N0:<br/>18 (66.6)<br/>N1: 8 (29.6)<br/>N2: 1 (3.7)<br/>N3: 0<br/>Tumor grade:<br/>Well-<br/>differentiated: 6<br/>(22.2)<br/>Moderately<br/>differentiated: 17<br/>(63)<br/>Poorly<br/>differentiated: 4<br/>(14.8)<br/>Squamous: 25<br/>(92.6)</p> |  | <p>OR time: 349<br/>(45)<br/>EBL: 119 (72)<br/>Lymph node<br/>harvest: 20 (7)</p> | <p>OR time: 285<br/>(66)<br/>EBL: 158 (82)<br/>Lymph node<br/>harvest: 19 (5)</p> |
|------------------------------------------------------------------------------------|-------------------------------------------------------------------------------------------------------------------------------|--|--------------------------------------------------------------------------------------------------------------------------------------------------------------------------------------------------------------------------------------------------------------------------------------------------------------------------------------------------------------------------------------------------------------------------------------------------------------------------------------------------------------------------------------------------------------------------------------------|--------------------------------------------------------------------------------------------------------------------------------------------------------------------------------------------------------------------------------------------------------------------------------------------------------------------------------------------------------------------------------------------------------------------------------------------------------------------------------------------------------------------------------------------------------------------------------------------|--|-----------------------------------------------------------------------------------|-----------------------------------------------------------------------------------|

|                                                                                                |                                                                                                                                              |                                                                                                                                                                                                      |                                                                                                                                                                                                                                                                                                                                                                                                           |                                                                                                                                                                                                                                                                                                                                                                                                                |                                                                                                                                                                 |                                                                                                                                                                                                                                                                                                                                                                                                 |                                                                                                                                                                                                                                                                                                                                                                        |
|------------------------------------------------------------------------------------------------|----------------------------------------------------------------------------------------------------------------------------------------------|------------------------------------------------------------------------------------------------------------------------------------------------------------------------------------------------------|-----------------------------------------------------------------------------------------------------------------------------------------------------------------------------------------------------------------------------------------------------------------------------------------------------------------------------------------------------------------------------------------------------------|----------------------------------------------------------------------------------------------------------------------------------------------------------------------------------------------------------------------------------------------------------------------------------------------------------------------------------------------------------------------------------------------------------------|-----------------------------------------------------------------------------------------------------------------------------------------------------------------|-------------------------------------------------------------------------------------------------------------------------------------------------------------------------------------------------------------------------------------------------------------------------------------------------------------------------------------------------------------------------------------------------|------------------------------------------------------------------------------------------------------------------------------------------------------------------------------------------------------------------------------------------------------------------------------------------------------------------------------------------------------------------------|
| <p>He, 2020<sup>7</sup><br/>N<br/>RCT<br/>N<br/>1 institutions/NR<br/>surgeons<br/>N<br/>N</p> | <p>robot-assisted<br/>esophagectomy<br/>and thoraco-<br/>laparoscopic<br/>esophagectomy</p>                                                  |                                                                                                                                                                                                      | <p>N: 94<br/>Age: 61.3 (8.2)<br/>Race: NR<br/>Male: 72%<br/>BMI: 22.7<br/>ASA:<br/>1: 6 (6.4)<br/>2: 82 (87.2)<br/>3: 6 (6.4)<br/>Smoking: NR<br/>DM: 12 (12.8)<br/>Tumor location:<br/>intrathoracic Upper:<br/>9 (9.6)<br/>Mid: 64 (68.1)<br/>Lower: 21 (22.3)<br/>Stage:<br/>0-I: 51 (54)<br/>II: 29 (30.9)<br/>III: 14 (14.9)<br/>Neoadjuvant: NR<br/>Squamous: 94<br/>(100)<br/>Adenocarcinoma:0</p> | <p>N: 98<br/>Age: 62.4 (9.1)<br/>Race: NR<br/>Male: 72%<br/>BMI: NR<br/>ASA: 22.8<br/>1: 9 (9.2)<br/>2: 80 (81.6)<br/>3: 9 (9.2)<br/>Smoking: NR<br/>DM: 14 (14.3)<br/>Tumor location:<br/>intrathoracic Upper:<br/>7 (7.1)<br/>Mid: 68 (69.4)<br/>Lower: 23 (23.5)<br/>Stage:<br/>0-I: 49 (50.0)<br/>II: 34 (34.7)<br/>III: 15 (15.3)<br/>Neoadjuvant: NR<br/>Squamous: 98<br/>(100)<br/>Adenocarcinoma:0</p> |                                                                                                                                                                 | <p>Operating<br/>time:<br/>Thoracic<br/>portion: NR<br/>Abd +<br/>cervical: NR<br/>Total: 304.2<br/>(82.5)<br/>Thoracic EBL:<br/>NS<br/>Total EBL:<br/>202.5 (73.4)<br/>Transfusion:<br/>NR<br/>Conversions<br/>total: 1<br/>Thoracic<br/>conversion (to<br/>lap transhiatal):<br/>NR<br/>Complications:<br/>NR<br/>LN harvest:<br/>22.2 (12.5)<br/>Margins<br/>positive:<br/>R0: 88 (95.7)</p> | <p>Operating time:<br/>Thoracic portion:<br/>NR Abd +<br/>cervical:NR<br/>Total: 315.5<br/>(35.7)<br/>Thoracic EBL:NS<br/>Total EBL: 216.8<br/>(44.6)<br/>Transfusions:NR<br/>Conversion total:<br/>1<br/>Thoracic<br/>conversion (to lap<br/>transhiatal):NR<br/>Complications:<br/>NR<br/>LN harvest: 20.1<br/>(8.3)<br/>Margins positive:<br/>R0: 93<br/>(96.9)</p> |
| <p>Jeong, 2016<sup>8</sup>N<br/>RetrospectiveY<br/>Single institutionN<br/>N</p>               | <p>Robot: 3 hole or 3<br/>field (laparotomy;<br/>only throacic portion<br/>is robotic)<br/><br/>Open: Ivor-Lewis,3-<br/>hole, or 3-field</p> | <p>N: 159<br/>Age &gt;65 years:<br/>50 (31%)<br/>Male: 149 (94)<br/>BMI: 22.7 (2.9)<br/>ASA &gt;2: 1 (0.6)<br/>Smoking: 138<br/>(87)<br/>DM: 18 (11)<br/>Albumin,<br/>med/IQR: 4.3<br/>(4.1-4.5)</p> | <p>N: 88<br/>Age &gt;65 years:<br/>25 (28%)<br/>Male: 80 (91)<br/>BMI: 22.6 (2.5)<br/>ASA &gt;2: 2 (2)<br/>Smoking: 76 (86)<br/>DM: 9 (10)<br/>Albumin,<br/>med/IQR: 4.3<br/>(4.2-4.6)<br/>Tumor location:</p>                                                                                                                                                                                            |                                                                                                                                                                                                                                                                                                                                                                                                                | <p>OR time (hours,<br/>median/IQR): 4.4<br/>(3.8-5.1)<br/>EBL (med/IQR):<br/>200 (150-300)<br/>Intraop transfusion:<br/>4<br/>(2.5)<br/>Intraop afib: 9 (6)</p> | <p>OR time<br/>(hours,<br/>median/IQR):<br/>4.8 (3.9-5.6)<br/>EBL<br/>(med/IQR): 200<br/>(100-250)<br/>Intraop<br/>transfusion: 0<br/>Intraop afib: 7<br/>(8)</p>                                                                                                                                                                                                                               |                                                                                                                                                                                                                                                                                                                                                                        |

|                                                                                                                      |                                                                                                                                                                                                   |                                                                                                                                                                                                                                                                                                                                         |                                                                                                                                                                                                                                                                                                                                |                                                                                                                                                                                                                                                                                                                               |                                                                                                                                                                    |                                                                                                                                                              |                                                                                                                                                                |
|----------------------------------------------------------------------------------------------------------------------|---------------------------------------------------------------------------------------------------------------------------------------------------------------------------------------------------|-----------------------------------------------------------------------------------------------------------------------------------------------------------------------------------------------------------------------------------------------------------------------------------------------------------------------------------------|--------------------------------------------------------------------------------------------------------------------------------------------------------------------------------------------------------------------------------------------------------------------------------------------------------------------------------|-------------------------------------------------------------------------------------------------------------------------------------------------------------------------------------------------------------------------------------------------------------------------------------------------------------------------------|--------------------------------------------------------------------------------------------------------------------------------------------------------------------|--------------------------------------------------------------------------------------------------------------------------------------------------------------|----------------------------------------------------------------------------------------------------------------------------------------------------------------|
|                                                                                                                      |                                                                                                                                                                                                   | Tumor location:<br>NR<br>Clinical<br>stage:I: 101<br>(64)<br>II: 46 (29)<br>III: 10 (6)<br>IV: 2 (1)                                                                                                                                                                                                                                    | NR<br>Clinical<br>stage:I: 59<br>(67)<br>II: 23 (26)<br>III: 5 (6)<br>IV: 1 (1)                                                                                                                                                                                                                                                |                                                                                                                                                                                                                                                                                                                               |                                                                                                                                                                    |                                                                                                                                                              |                                                                                                                                                                |
| Meredith,<br>2019 <sup>9</sup> N<br>Retrospective<br>(prospectively<br>maintained<br>database)N<br>Unkno<br>wnY<br>N | Six approaches<br>compared. The<br>onlyrobotic<br>approach is Ivor-<br>Lewis.<br>Comparable<br>methods using<br>otherapproaches in<br>this study are open<br>Ivor-Lewis and<br>MIE transthoracic. | N: 475<br>Age: 64 (11)<br>Male: 412 (86.7)<br>BMI: 28 (6)ASA:<br>I: 2 (0.5)<br>II: 207 (54)<br>III: 172 (44.9)<br>IV: 2 (0.5)CCI:<br>NR<br>Smoking: NRDM:<br>NR<br>Albumin: NR<br>Tumor location:<br>NR<br>Clinical Stage:I:<br>47 (12.6)<br>II: 142 (38.2)<br>III: 162 (43.5)<br>IV: 13 (3.5)<br>Neoadjuvant<br>therapy: 274<br>(57.7) | N: 144<br>Age: 66 (10)<br>Male: 113 (78.5)<br>BMI: 28 (9)ASA:<br>I: 0<br>II: 50 (35.2)<br>III: 90 (63.4)<br>IV: 2 (1.4)CCI:<br>NR<br>Smoking: NRDM:<br>NR<br>Albumin: NR<br>Tumor location:<br>NR<br>Clinical Stage:I:<br>32 (23.5)<br>II: 46 (33.8)<br>III: 56 (41.2)<br>IV: 1 (0.7)<br>Neoadjuvant<br>therapy: 112<br>(77.8) | N: 95<br>Age: 62 (9)<br>Male: 81 (85.3)<br>BMI: 27 (5)<br>ASA:<br>I: 1 (1.1)<br>II: 53 (60.9)<br>III: 33 (37.9)<br>IV: 0 CCI:<br>NR<br>Smoking: NR<br>DM: NR<br>Albumin: NR<br>Tumor location:<br>NR<br>Clinical Stage:<br>I: 12 (14.3)<br>II: 24 (28.6)<br>III: 42 (50)<br>IV: 5 (6)<br>Neoadjuvant<br>therapy: 73<br>(76.8) | OR time<br>(min;<br>mean/SD):<br>286<br>(69)<br>EBL: 289 (354)<br>Complications: 7<br>(1.5)<br>LN harvest: 10<br>(6)<br>Margins:<br>R1: 18<br>(3.8)<br>R2: 7 (1.5) | OR time<br>(min;<br>mean/SD):<br>409<br>(104)<br>EBL: 156<br>(107)<br>Complications<br>:2 (1.4)<br>LN harvest:<br>20<br>(9)<br>Margi<br>ns:R1:<br>0<br>R2: 0 | OR time<br>(min;<br>mean/SD):<br>299<br>(87)<br>EBL: 189<br>(188)<br>Complications<br>:2 (2.1)<br>LN harvest: 14<br>(7)<br>Margins:<br>R1: 6<br>(6.5)<br>R2: 0 |
| Motoyama,<br>2019 <sup>10</sup> N<br>Retrospective<br>N<br>1<br>institution<br>N<br>N                                | Robot:<br>transthoracic<br>(unclear how<br>abdominal portion<br>was performed)<br>MIE:<br>transthoracic<br>(unclear how<br>abdominal portion<br>was performed)                                    |                                                                                                                                                                                                                                                                                                                                         | N: 21<br>Age<br>(med/range):63<br>(44-76)<br>Male: 19<br>(90)BMI:<br>NR ASA:<br>NR CCI:<br>NR<br>Smoking:<br>NRDM: NR<br>Albumin: NR                                                                                                                                                                                           | N: 38<br>Age<br>(med/range):66<br>(49-75)<br>Male: 32<br>(84)BMI:<br>NR ASA:<br>NR CCI:<br>NR<br>Smoking: NR<br>DM: NR<br>Albumin: NR                                                                                                                                                                                         |                                                                                                                                                                    | OR time<br>(min;<br>med/range):<br>634 (529-<br>699)<br>OR time<br>thoracic:<br>320<br>(242-401)<br>EBL<br>(med/range):<br>492 (195-<br>1591)                | OR time (min;<br>med/range):<br>598.5 (475-<br>761)<br>OR time<br>thoracic: 312.5<br>(152-417)<br>EBL<br>(med/range):<br>385 (177-<br>3184)<br>EBL thoracic:   |

|                                                                                                    |                                                                                                                                                                  |  |                                                                                                                                                                                                                                                                                                                                                                                                                                                                                                |                                                                                                                                                                                                                                                                                                                                                                                                                                                                                                             |  |                                                                                                                            |                                                                                                                |
|----------------------------------------------------------------------------------------------------|------------------------------------------------------------------------------------------------------------------------------------------------------------------|--|------------------------------------------------------------------------------------------------------------------------------------------------------------------------------------------------------------------------------------------------------------------------------------------------------------------------------------------------------------------------------------------------------------------------------------------------------------------------------------------------|-------------------------------------------------------------------------------------------------------------------------------------------------------------------------------------------------------------------------------------------------------------------------------------------------------------------------------------------------------------------------------------------------------------------------------------------------------------------------------------------------------------|--|----------------------------------------------------------------------------------------------------------------------------|----------------------------------------------------------------------------------------------------------------|
|                                                                                                    |                                                                                                                                                                  |  | <p>Tumor location:<br/> Upper: 6 (29)<br/> Mid: 7 (33)<br/> Lower: 8 (38)<br/> Clinical T stage:<br/> T1b: 5 (24)<br/> T2: 5 (24)<br/> T3: 11 (52)<br/> Clinical N stage:N0:<br/> 8 (38)<br/> N1: 10 (48)<br/> N2: 3 (14)<br/> Clinical stage:<br/> IA: 4 (19)<br/> IB: 3 (14)<br/> IIA: 1 (5)<br/> IIB: 3 (14)<br/> IIIA: 7 (33)<br/> IIIB: 3 (14)<br/> Neoadjuvant<br/> Chemoradiation:12<br/> (57)<br/> Neoadjuvant<br/> chemo only: 0<br/> Squamous cell<br/> carcinoma: 21<br/> (100)</p> | <p>Tumor location:<br/> Upper: 9 (24)<br/> Mid: 16 (42)<br/> Lower: 13 (34)<br/> Clinical T stage:<br/> T1b: 16 (42)<br/> T2: 2 (5)<br/> T3: 20 (53)<br/> Clinical N stage:<br/> N0: 19 (50)<br/> N1: 13 (34)<br/> N2: 6 (15)<br/> Clinical stage:<br/> IA: 14 (37)<br/> IB: 2 (5)<br/> IIA: 3 (8)<br/> IIB: 2 (5)<br/> IIIA: 11 (29)<br/> IIIB: 6 (16)<br/> Neoadjuvant<br/> Chemoradiation:19<br/> (50)<br/> Neoadjuvant<br/> chemo only: 1<br/> (3)<br/> Squamous cell<br/> carcinoma: 38<br/> (100)</p> |  | <p>EBL thoracic:<br/> 110 (15-375)<br/> LN harvest: 52<br/> (36-104)<br/> LN harvest<br/> mediastinal:<br/> 23 (11-41)</p> | <p>165 (23-559)<br/> LN harvest: 59<br/> (35-97)<br/> LN harvest<br/> mediastinal: 20<br/> (7-68)</p>          |
| <p>Naffouje, 2019<sup>11</sup><br/> Y (NSQIP 2016-2017)<br/> RetrospectiveY<br/> Many<br/> Y N</p> | <p>Open vs MIE (robot<br/> and all other MIE)<br/> Ivor-Lewis Secondary<br/> analysis compared<br/> laparoscopic vs<br/> robotic (2:1 propensity<br/> match)</p> |  | <p>MatchedN:<br/> 41<br/> Age: 62.76 (9.98)<br/> White: 39 (95.1)<br/> Black: 1 (2.4)<br/> Other race: 1<br/> (2.4)<br/> Male: 36 (87.8)<br/> BMI: 27.8 (6.19)<br/> ASA:<br/> I: 0<br/> II: 5 (12.2)</p>                                                                                                                                                                                                                                                                                       | <p>Matched<br/> N: 82<br/> Age: 63.27 (9.28)<br/> White: 75 (91.5)<br/> Black: 3 (3.7)<br/> Other race: 4<br/> (4.8)<br/> Male: 72 (87.8)<br/> BMI: 27.98 (5.6)<br/> ASA:<br/> I: 0<br/> II: 11 (13.4)</p>                                                                                                                                                                                                                                                                                                  |  | <p>OR time: 449<br/> (116)<br/> Conversion to<br/> open: 1 (2.4)<br/> Negative<br/> margins: 35<br/> (85.4)</p>            | <p>OR time: 445<br/> (96)<br/> Conversion to<br/> open: 7 (8.5)<br/> Negative<br/> margins: 74<br/> (90.2)</p> |

|                                                                      |                                                                                                        |                                                                                                                  |                                                                                                                                                                                                                                                                                                                                                                                                |                                                                                                                                                                                                                                                                                                                                                                                                                |                                                                                                                                                      |                                                                                                                              |  |
|----------------------------------------------------------------------|--------------------------------------------------------------------------------------------------------|------------------------------------------------------------------------------------------------------------------|------------------------------------------------------------------------------------------------------------------------------------------------------------------------------------------------------------------------------------------------------------------------------------------------------------------------------------------------------------------------------------------------|----------------------------------------------------------------------------------------------------------------------------------------------------------------------------------------------------------------------------------------------------------------------------------------------------------------------------------------------------------------------------------------------------------------|------------------------------------------------------------------------------------------------------------------------------------------------------|------------------------------------------------------------------------------------------------------------------------------|--|
|                                                                      |                                                                                                        |                                                                                                                  | III: 35 (85.4)<br>IV: 1 (2.4)<br>Smoking: 12 (29.3)<br>DM: 6 (14.6)<br>Albumin: 3.83 (0.61)<br>cT stage: T1: 13 (31.7)<br>T2: 12 (29.3)<br>T3: 16 (39)<br>T4: 0<br>Tx: 0<br>cN stage: 0: 28 (68.3)<br>1: 8 (19.5)<br>2: 4 (9.8)<br>3: 1 (2.4)<br>Nx: 0<br>Neoadjuvant chemo: 30 (73.2)<br>Neoadjuvant radiation: 30 (73.2)<br>Adenocarcinoma: 37 (90.2)<br>SCC: 4 (9.8)<br>Other malignancy: 0 | III: 68 (82.9)<br>IV: 3 (3.7)<br>Smoking: 21 (25.6)<br>DM: 17 (20.7)<br>Albumin: 3.86 (0.38)<br>cT stage: T1: 32 (39)<br>T2: 17 (20.7)<br>T3: 31 (37.8)<br>T4: 0<br>Tx: 2 (2.4)<br>cN stage: 0: 52 (63.4)<br>1: 13 (15.9)<br>2: 14 (17.1)<br>3: 0<br>Nx: 3 (3.7)<br>Neoadjuvant chemo: 62 (75.6)<br>Neoadjuvant radiation: 56 (68.3)<br>Adenocarcinoma: 76 (92.7)<br>SCC: 5 (6.1)<br>Other malignancy: 1 (1.2) |                                                                                                                                                      |                                                                                                                              |  |
| Osaka, 2018 <sup>12</sup> N<br>RetrospectiveN<br>1 institutionN<br>N | Robot (thoracic)with<br>unknown method for<br>abdomen vs.<br>thoracotomy and<br>unknown for<br>abdomen | N: 30<br>Age (med, range): 63 (46-77)<br>Male: 27 (90)<br>BMI: NR<br>ASA: NR<br>CCI: NR<br>Smoking: NR<br>DM: NR | N: 30<br>Age (med, range): 62 (49-78)<br>Male: 27 (90)<br>BMI: NR<br>ASA: NR<br>CCI: NR<br>Smoking: NR<br>DM: NR                                                                                                                                                                                                                                                                               |                                                                                                                                                                                                                                                                                                                                                                                                                | OR time, minutes (med, range): 398 (329-498)<br>EBL total (med, range): 388 (125-990)<br>EBL thoracic (med, range): 135 (44-325)<br>LN harvest (med, | OR time, minutes (med, range): 563 (476-713)<br>EBL total (med, range): 197 (10-640)<br>EBL thoracic (med, range): 21 (0-97) |  |



|                                                                     |                                                                                                                                                                                                                                                                                                                                    |                                                                                                                                                                                                                                                      |                                                                                                                                                                                                                                                                                                                                                                                                                         |                                                                                                                                                                                                                                                                                                                                                                                                                  |                    |                                                                                                                                                    |                                                                                                                                                      |
|---------------------------------------------------------------------|------------------------------------------------------------------------------------------------------------------------------------------------------------------------------------------------------------------------------------------------------------------------------------------------------------------------------------|------------------------------------------------------------------------------------------------------------------------------------------------------------------------------------------------------------------------------------------------------|-------------------------------------------------------------------------------------------------------------------------------------------------------------------------------------------------------------------------------------------------------------------------------------------------------------------------------------------------------------------------------------------------------------------------|------------------------------------------------------------------------------------------------------------------------------------------------------------------------------------------------------------------------------------------------------------------------------------------------------------------------------------------------------------------------------------------------------------------|--------------------|----------------------------------------------------------------------------------------------------------------------------------------------------|------------------------------------------------------------------------------------------------------------------------------------------------------|
|                                                                     |                                                                                                                                                                                                                                                                                                                                    | Albumin: NR<br>Tumor location:<br>Upper: 1 (3.3)<br>Mid: 15 (50)<br>Lower: 14 (46.7)<br>Clinical Stage:I:<br>16 (53.3)<br>II: 13 (43.3)<br>III: 1 (3.3)<br>Neoadjuvant<br>chemo: 8 (26.7)<br>Adenocarcinoma:<br>NR<br>Squamous cell<br>carcinoma: NR | Albumin: NR<br>Tumor location:<br>Upper: 1 (3.3)<br>Mid: 15 (50)<br>Lower: 14 (46.7)<br>Clinical Stage:I:<br>14 (46.7)<br>II: 10 (33.3)<br>III: 6 (20)<br>Neoadjuvant chemo:<br>13 (43.3)<br>Adenocarcinoma:<br>NR<br>Squamous cell<br>carcinoma: NR                                                                                                                                                                    |                                                                                                                                                                                                                                                                                                                                                                                                                  | range): 23 (12-39) | LN harvest<br>(med, range):<br>25 (8-58)                                                                                                           |                                                                                                                                                      |
| Park, 2016 <sup>13</sup> N<br>RetrospectiveN<br>1 InstitutionN<br>N | Transthoracic robotvs<br>transthoracic VATS.<br>In the robotcohort,<br>90% were<br>McKeown and 10%<br>were Ivor-Lewis.<br>Abdominal portion in<br>the robotic cohortwas<br>done robotically in<br>58%.<br>In the MIE cohort,<br>abdominal portion<br>was laparoscopic in<br>49%, 19% were Ivor-<br>Lewis, and 81% were<br>McKeown. |                                                                                                                                                                                                                                                      | N: 62<br>Age: 64.3 (8)<br>Male: 57 (91.9)<br>BMI: 23.5 (2.8)ASA:<br>I: 21 (33.9)<br>II: 37 (59.7)<br>III: 4 (6.5)<br>Smoking: 49 (79)<br>Never smoker: 13<br>(21)<br>DM: 9 (14.5)<br>Albumin: NR<br>Tumor location:<br>Upper: 8 (12.9)<br>Mid: 15 (24.2)<br>Lower: 39 (62.9)<br>FEV1; pred%, SD:<br>101.6 (17.1)<br>Clinical stage:I:<br>23 (37.1)<br>II: 28 (45.2)<br>III: 11 (17.7)<br>Clinial T stage:T1:<br>31 (50) | N: 43<br>Age: 66.2 (7.4)<br>Male: 40 (93)<br>BMI: 23.3 (3.1)<br>ASA:<br>I: 11 (25.6)<br>II: 32 (74.4)<br>III: 0<br>Smoking: 35<br>(81.4)<br>DM: 11 (25.6)<br>Albumin: NR<br>Tumor location:<br>Upper: 7 (16.3)<br>Mid: 9 (20.9)<br>Lower: 27 (62.8)<br>FEV1; pred%,<br>SD: 106.7 (13.8)<br>Clinical stage:I:<br>21 (48.8)<br>II: 15 (34.9)<br>III: 7 (16.3)<br>Clinial T stage:T1:<br>25 (58.1)<br>T2: 13 (30.2) |                    | OR time:<br>Total: 490.3<br>(84)<br>Thoracic: 185.2<br>(67.4)<br>Abdominal:<br>305.1 (66.6)<br>EBL: 462.9<br>(493.9)<br>LN harvest:<br>37.3 (17.1) | OR time:<br>Total: 458.4<br>(111.9)<br>Thoracic: 120.1<br>(68.5)<br>Abdominal: 338.4<br>(105.4)<br>EBL: 466.8<br>(333)<br>LN harvest: 28.7<br>(11.8) |

|                                                                               |                                                                                                                      |                                                                                                                                                                                                                                                                                                                                                                                                                                                    |                                                                                                                                                                                                                                                                                                                                                                                                                                                      |                                                                                                                                                                                     |                                                                                                                                                                              |                                                                                                                                                                          |  |
|-------------------------------------------------------------------------------|----------------------------------------------------------------------------------------------------------------------|----------------------------------------------------------------------------------------------------------------------------------------------------------------------------------------------------------------------------------------------------------------------------------------------------------------------------------------------------------------------------------------------------------------------------------------------------|------------------------------------------------------------------------------------------------------------------------------------------------------------------------------------------------------------------------------------------------------------------------------------------------------------------------------------------------------------------------------------------------------------------------------------------------------|-------------------------------------------------------------------------------------------------------------------------------------------------------------------------------------|------------------------------------------------------------------------------------------------------------------------------------------------------------------------------|--------------------------------------------------------------------------------------------------------------------------------------------------------------------------|--|
|                                                                               |                                                                                                                      |                                                                                                                                                                                                                                                                                                                                                                                                                                                    | <p>T2: 21 (33.9)<br/> T3: 10 (16.1)<br/> Clinical N stage:N0:<br/> 42 (67.7)<br/> N+: 20 (32.3)<br/> Neoadjuvant<br/> chemoradiation:8<br/> (12.9)<br/> Squamous cell<br/> carcinoma: 62<br/> (100)</p>                                                                                                                                                                                                                                              | <p>T3: 5 (11.6)<br/> Clinical N stage:<br/> N0: 27 (64.3)<br/> N+: 15 (35.7)<br/> Neoadjuvant<br/> chemoradiation:4<br/> (9.3)<br/> Squamous cell<br/> carcinoma: 43<br/> (100)</p> |                                                                                                                                                                              |                                                                                                                                                                          |  |
| <p>Rolf, 2017<sup>4</sup>N<br/> RetrospectiveN<br/> 1 InstitutionN<br/> N</p> | <p>Open Ivor-Lewis vs<br/> Hybrid minimally-<br/> invasive Ivor-Lewis<br/> (Robot in abdomen<br/> + thoracotomy)</p> | <p>N: 160<br/> Age (med,<br/> range): 65 (22-<br/> 88)<br/> Male: 125 (78)<br/> BMI (med,<br/> range): 26.6<br/> (15.6-43.7)<br/> ASA:<br/> 1: 41 (26)<br/> 2: 80 (50)<br/> 3: 39 (24)<br/> 4: 0<br/> CCI (med,<br/> range): 20.9 (0-<br/> 100)<br/> Smoking: NR<br/> DM: NR<br/> Albumin: NR<br/> Tumor location:<br/> NR<br/> Stage: NR<br/> Neoadjuvant<br/> therapy: NR<br/> Adenocarcinoma:<br/> NR<br/> Squamous cell<br/> carcinoma: NR</p> | <p>N: 56<br/> Age (med, range):<br/> 66 (39-<br/> 86)<br/> Male: 50 (88)<br/> BMI (med,<br/> range): 25.8<br/> (18.8-31.2)<br/> ASA:<br/> 1: 17 (30)<br/> 2: 28 (50)<br/> 3: 12 (21)<br/> 4: 1 (2)<br/> CCI (med, range):<br/> 12.2 (0-<br/> 100)<br/> Smoking: NR<br/> DM: NR<br/> Albumin: NR<br/> Tumor location:<br/> NR<br/> Stage: NR<br/> Neoadjuvant therapy:<br/> NR<br/> Adenocarcinoma:<br/> NR<br/> Squamous cell<br/> carcinoma: NR</p> |                                                                                                                                                                                     | <p>OR time (med,<br/> range): 248 (100-<br/> 420)<br/> EBL (med, range):<br/> 600 (100-<br/> 4,400)<br/> LN harvest (med,<br/> range): 23 (11-<br/> 60)<br/> Margins: NR</p> | <p>OR time (med,<br/> range): 232<br/> (174-800)<br/> EBL (med,<br/> range): 200<br/> (50-1,970)<br/> LN harvest<br/> (med, range):<br/> 28 (15-61)<br/> Margins: NR</p> |  |

|                                                                                                                                                |                                                                                                                                                                                            |                                                                                                                                                                                                                                                                                                                                                                                                                                                                                                                                                                                           |                                                                                                                                                                                                                                                                                                                                                                                                                                                                                                                                                                      |  |                                                                                                                                                                            |                                                                                                                                                                          |  |
|------------------------------------------------------------------------------------------------------------------------------------------------|--------------------------------------------------------------------------------------------------------------------------------------------------------------------------------------------|-------------------------------------------------------------------------------------------------------------------------------------------------------------------------------------------------------------------------------------------------------------------------------------------------------------------------------------------------------------------------------------------------------------------------------------------------------------------------------------------------------------------------------------------------------------------------------------------|----------------------------------------------------------------------------------------------------------------------------------------------------------------------------------------------------------------------------------------------------------------------------------------------------------------------------------------------------------------------------------------------------------------------------------------------------------------------------------------------------------------------------------------------------------------------|--|----------------------------------------------------------------------------------------------------------------------------------------------------------------------------|--------------------------------------------------------------------------------------------------------------------------------------------------------------------------|--|
| <p>Sarkaria, 2019<sup>15</sup>N<br/>Non-randomized prospective trial N<br/>Single institution/8 surgeons (2 performed robotic)<br/>Y<br/>N</p> | <p>Robotic Ivor Lewis (62/64) and McKeown (2/64) vs open Ivor Lewis (103/106) Thoracoabdominal (3/106)</p> <p>"All but 1 patient who underwent MIE did so via a total RAMIE approach."</p> | <p>N: 106<br/>Age (med, IQR): 63 (28-83)<br/>Male: 91 (85.8)<br/>BMI (med, IQR): 28.4 (16.9-49.5)<br/>ASA:<br/>II: 15 (14.2)<br/>III: 84 (79.2)<br/>IV: 7 (6.6)<br/># of comorbidities:<br/>0: 31 (29.2)<br/>1-2: 62 (58.5)<br/>&gt;2: 13 (12.3)<br/>Smoking: NR<br/>DM: NR<br/>Albumin: NR<br/>Tumor location:<br/>GE junction: 104 (98.1)<br/>Distal: 2 (1.9)<br/>Stage:<br/>0: 2 (1.9)<br/>I: 14 (13.2)<br/>II: 26 (24.5)<br/>III: 63 (59.4)<br/>IV: 1 (0.9)<br/>Neoadjuvant treatment: 87 (82.1)<br/>Squamous: 7 (6.6)<br/>Adenocarcinoma: 98 (92.5)<br/>Other pathology: 1 (0.9)</p> | <p>N: 64<br/>Age (med, IQR): 61 (45-82)<br/>Male: 53 (82.8)<br/>BMI (med, IQR): 29.1 (15.6-47.8)<br/>ASA:<br/>II: 9 (14.1)<br/>III: 51 (79.7)<br/>IV: 4 (6.3)<br/># of comorbidities: 23 (35.9)<br/>1-2: 34 (53.1)<br/>&gt;2: 7 (10.9)<br/>Smoking: NR<br/>DM: NR<br/>Albumin: NR<br/>Tumor location:<br/>GE junction: 60 (93.8)<br/>Distal: 4 (6.3)<br/>Stage:<br/>0: 1 (1.6)<br/>I: 11 (17.5)<br/>II: 17 (27)<br/>III: 34 (54)<br/>IV: 0 (0)<br/>Neoadjuvant treatment: 48 (75)<br/>Squamous: 4 (6.3)<br/>Adenocarcinoma: 59 (93.7)<br/>Other pathology: 0 (0)</p> |  | <p>OR time (hours, median &amp; range): 5.44 (3.5-10.3)<br/>EBL (med, range): 350 (100-2300)<br/>LN harvest (med, range): 22 (0-50)<br/>Margins positive (R1): 3 (2.8)</p> | <p>OR time (hours, median &amp; range): 6.4 (4.9-10.6)<br/>EBL (med, range): 250 (50-600)<br/>LN harvest (med, range): 25 (14-56)<br/>Margins positive (R1): 2 (3.1)</p> |  |
|------------------------------------------------------------------------------------------------------------------------------------------------|--------------------------------------------------------------------------------------------------------------------------------------------------------------------------------------------|-------------------------------------------------------------------------------------------------------------------------------------------------------------------------------------------------------------------------------------------------------------------------------------------------------------------------------------------------------------------------------------------------------------------------------------------------------------------------------------------------------------------------------------------------------------------------------------------|----------------------------------------------------------------------------------------------------------------------------------------------------------------------------------------------------------------------------------------------------------------------------------------------------------------------------------------------------------------------------------------------------------------------------------------------------------------------------------------------------------------------------------------------------------------------|--|----------------------------------------------------------------------------------------------------------------------------------------------------------------------------|--------------------------------------------------------------------------------------------------------------------------------------------------------------------------|--|

|                                                                                                                                          |                                                                                                          |                                                                                                                                                                                |                                                                                                                                                                                                                                                                                                                                                                                      |                                                                                                                                                                                                                                                                                                                                                                                                            |                                                                                                                                                                                                      |                                                                                                                                                                                                            |                                                                                                                                                                                                              |
|------------------------------------------------------------------------------------------------------------------------------------------|----------------------------------------------------------------------------------------------------------|--------------------------------------------------------------------------------------------------------------------------------------------------------------------------------|--------------------------------------------------------------------------------------------------------------------------------------------------------------------------------------------------------------------------------------------------------------------------------------------------------------------------------------------------------------------------------------|------------------------------------------------------------------------------------------------------------------------------------------------------------------------------------------------------------------------------------------------------------------------------------------------------------------------------------------------------------------------------------------------------------|------------------------------------------------------------------------------------------------------------------------------------------------------------------------------------------------------|------------------------------------------------------------------------------------------------------------------------------------------------------------------------------------------------------------|--------------------------------------------------------------------------------------------------------------------------------------------------------------------------------------------------------------|
| <p>Tagkalos, 2019<sup>16</sup>N<br/>Retrospective study of prospectively collected database<br/>Y<br/>1 institution/1 surgeonN<br/>N</p> | <p>Robot (thoracic and abdominal) Ivor-Lewis vs. minimally-invasive(VATS and laparoscopy) Ivor-Lewis</p> |                                                                                                                                                                                | <p>Matched:<br/>N: 40<br/>Age: 62<br/>BMI: 26.4ASA:<br/>1-2: 22 (55)<br/>3-4: 18 (45)<br/>DM: 4 (10)<br/>Pulmonary comorbidities: 8 (20)CV comorbidities: 15 (37.5)<br/>Tumor location:<br/>Upper: 0<br/>Mid: 8 (20)<br/>Lower: 32 (80)cT stage:<br/>1-2: 7 (17.5)<br/>3-4: 33 (82.5)<br/>cN stage:0: 8 (20)<br/>1: 32 (80)<br/>Chemoradiation:22 (55)<br/>Chemo only: 11 (27.5)</p> | <p>Matched:<br/>N: 40<br/>Age: 63<br/>BMI: 25.6<br/>ASA:<br/>1-2: 19 (47.5)<br/>3-4: 21 (52.5)<br/>DM: 5 (12.5)<br/>Pulmonary comorbidities: 6 (15)<br/>CV comorbidities: 16 (40)<br/>Tumor location:<br/>Upper: 2 (5)<br/>Mid: 6 (15)<br/>Lower: 32 (80)<br/>cT stage:<br/>1-2: 10 (25)<br/>3-4: 30 (75)<br/>cN stage:0: 10 (25)<br/>1: 30 (75)<br/>Chemoradiation:21 (52.5)<br/>Chemo only: 9 (22.5)</p> |                                                                                                                                                                                                      | <p>Matched OR time (med, range): 388 (255-475)<br/>Abd time: 151 (80-250)<br/>Thoracic time: 223 (170-320)<br/>EBL: 339 (198)<br/>LN harvest (median, range): 27 (13-84)<br/>Negative margins: 38 (95)</p> | <p>Matched OR time (med, range): 321 (224-519)<br/>Abd time: 125 (66-325)<br/>Thoracic time: 201 (158-295)<br/>EBL: 343 (181)<br/>LN harvest (median, range): 23 (11-48)<br/>Negative margins: 39 (97.5)</p> |
| <p>van der Sluis, 2019<sup>17</sup>N<br/>RCT<br/>N<br/>1 institutions/2 surgeons<br/>N<br/>N</p>                                         | <p>Open McKeown v Robot transthoracic with laparoscopic abdominal and open cervical portions</p>         | <p>N: 55<br/>Age: 65 (8.2)<br/>Male: 42 (76)<br/>BMI: 25.5 (4.7)<br/>ASA:<br/>1: 11 (20)<br/>2: 34 (62)<br/>3: 10 (18)<br/>Comorbidity: 41 (75)<br/>Smoking: NR<br/>DM: NR</p> | <p>N: 54<br/>Age: 64 (8.9)<br/>Male: 46 (85)<br/>BMI: 26.1 (4.4)ASA:<br/>1: 13 (24)<br/>2: 37 (69)<br/>3: 6 (11)<br/>Comorbidity: 43 (80)<br/>Smoking: NR<br/>DM: NR</p>                                                                                                                                                                                                             |                                                                                                                                                                                                                                                                                                                                                                                                            | <p>Operating time:<br/>Thoracic portion: 135 (23.3)<br/>Abd + cervical:161 (30.1)<br/>Total: 296 (33.9)<br/>Thoracic EBL: 200 (195-313)<br/>Total EBL: 568 (428-800)<br/>Complications: 9 (16.4)</p> | <p>Operating time:<br/>Thoracic portion: 170 (34.6)<br/>Abd + cervical: 186 (38.7)<br/>Total: 349 (56.9)<br/>Thoracic EBL: 120 (78-200)</p>                                                                |                                                                                                                                                                                                              |

|                                                                                                 |                                                            |                                                                                                                                                                                                                                                                                |                                                                                                                                                                                                                                                                                               |                                                                                                                                                                                                                                                                                                           |                                                             |                                                                                                                                                                                                                          |                                                                                          |
|-------------------------------------------------------------------------------------------------|------------------------------------------------------------|--------------------------------------------------------------------------------------------------------------------------------------------------------------------------------------------------------------------------------------------------------------------------------|-----------------------------------------------------------------------------------------------------------------------------------------------------------------------------------------------------------------------------------------------------------------------------------------------|-----------------------------------------------------------------------------------------------------------------------------------------------------------------------------------------------------------------------------------------------------------------------------------------------------------|-------------------------------------------------------------|--------------------------------------------------------------------------------------------------------------------------------------------------------------------------------------------------------------------------|------------------------------------------------------------------------------------------|
|                                                                                                 |                                                            | Albumin: NR<br>Tumor location:<br>Upper: 0 (0)<br>Mid: 8 (15)<br>Lower: 29 (53)<br>Clinical stage:<br>IA: 4 (7)<br>IIA: 3 (6)<br>IIB: 18 (33)<br>IIIA: 21 (38)<br>IIIB: 6 (11)<br>IIIC: 3 (6)<br>Neoadjuvant: 48<br>(87)<br>Squamous: 12<br>(23)<br>Adenocarcinoma:<br>43 (78) | Albumin: NR<br>Tumor location:<br>Upper: 1 (2)<br>Mid: 5 (9)<br>Lower: 26 (48)<br>Clinical stage: IA:<br>4 (7)<br>IIA: 5 (9)<br>IIB: 11 (20)<br>IIIA: 13 (24)<br>IIIB: 13 (24)<br>IIIC: 8 (15)<br>Neoadjuvant: 48<br>(90)<br>Squamous: 13<br>(24)<br>Adenocarcinoma:41<br>(76)                |                                                                                                                                                                                                                                                                                                           | LN harvest: 25<br>(17-31)<br>Margins positive:<br>R1: 2 (4) | Total EBL: 400<br>(258-581)<br>Conversion<br>total: 3 (5.6)<br>Thoracic<br>conversion (to<br>lap transhiatal):<br>1<br>(1.9)<br>Complications:7<br>(13)<br>LN harvest: 27<br>(17-33)<br>Margins<br>positive: R1:<br>2(4) |                                                                                          |
| Washington, 2019 <sup>18</sup> N<br>RetrospectiveN<br>Single institution/1<br>surgeon<br>Y<br>N | Robotic vs<br>laparoscopic<br>transhiatal<br>esophagectomy |                                                                                                                                                                                                                                                                                | N: 18<br>Age: 61.9 (range<br>42-76)<br>Male: 17 (94.4)<br>BMI: 27.6 (range<br>20.7-38.2)<br>ASA: NR<br>CCI: NR<br>Smoking: NR<br>DM: NR<br>Albumin: NR<br>Neoadjuvant<br>treatment: 18<br>(100)<br>cT stage:1:<br>0<br>2: 4 (22.2)<br>3: 14 (77.8)<br>cN stage:0:<br>6 (33.3)<br>1: 12 (66.7) | N: 18<br>Age: 58.9 (range<br>40 to 70)<br>Male: 16 (88.9)<br>BMI: 27.5 (range<br>19.2-39.4)<br>ASA: NR<br>CCI: NR<br>Smoking: NR<br>DM: NR<br>Albumin: NR<br>Neoadjuvant<br>treatment: 15<br>(83.3)<br>cT stage: 1:<br>3 (16.7)<br>2: 2 (11.1)<br>3: 12 (66.7)<br>cN stage:<br>0: 6 (33.3)<br>1: 8 (44.4) |                                                             | OR time: 168<br>(24)<br>LN harvest:<br>14.28 (7.8)<br>Margins<br>positive (R1):1<br>(5.6)                                                                                                                                | OR time: 164<br>(23.1)<br>LN harvest: 13.9<br>(8.5)<br>Margins positive<br>(R1): 1 (5.6) |

|                                                                                                   |                                                                                                                                             |                                                                                             |                                                                                                                                                                                                                                                                                                                                                                                                                        |                                                                                                                                                                                                                                                                                                                                                                                                                                  |                                                                                            |                                                                                                                                                                                                                                                                                               |                                                                                                                                                                                                                                                                                               |
|---------------------------------------------------------------------------------------------------|---------------------------------------------------------------------------------------------------------------------------------------------|---------------------------------------------------------------------------------------------|------------------------------------------------------------------------------------------------------------------------------------------------------------------------------------------------------------------------------------------------------------------------------------------------------------------------------------------------------------------------------------------------------------------------|----------------------------------------------------------------------------------------------------------------------------------------------------------------------------------------------------------------------------------------------------------------------------------------------------------------------------------------------------------------------------------------------------------------------------------|--------------------------------------------------------------------------------------------|-----------------------------------------------------------------------------------------------------------------------------------------------------------------------------------------------------------------------------------------------------------------------------------------------|-----------------------------------------------------------------------------------------------------------------------------------------------------------------------------------------------------------------------------------------------------------------------------------------------|
|                                                                                                   |                                                                                                                                             |                                                                                             | Squamous: 4<br>(22.2)<br>Adenocarcinoma:14<br>(77.8)                                                                                                                                                                                                                                                                                                                                                                   | Squamous: 3<br>(16.7)<br>Adenocarcinoma:<br>15 (83.3)                                                                                                                                                                                                                                                                                                                                                                            |                                                                                            |                                                                                                                                                                                                                                                                                               |                                                                                                                                                                                                                                                                                               |
| Yang, 2019 <sup>19</sup><br>N<br>RetrospectiveY<br>Single institution/single<br>surgeon<br>N<br>N | Robot McKeown (abd<br>and thoracic portions)<br>vs thoracoscopic<br>McKeown                                                                 |                                                                                             | MatchedN:<br>271<br>Age: 63.4 (7.1)<br>Male: 222 (81.9)<br>BMI: 23.2 (3)ASA:<br>I: 4 (1.5)<br>II: 243 (89.7)<br>III: 24 (8.9)CCI:<br>NR<br>Smoking: NR<br>DM: NR<br>Albumin: NR<br>Tumor location:<br>Upper: 38 (14)<br>Mid: 169 (62.4)<br>Lower: 64 (23.6)<br>Clinical stage:I:<br>70 (25.8)<br>II: 97 (35.8)<br>III: 79 (29.2)<br>IV: 25 (9.2)<br>Neoadjuvant<br>therapy: 29<br>(10.7)<br>Squamous cell:271<br>(100) | Matched<br>N: 271<br>Age: 63.5 (7.4)<br>Male: 221 (81.5)<br>BMI: 23.2 (2.9)<br>ASA:<br>I: 4 (1.5)<br>II: 242 (89.3)<br>III: 25 (9.2)CCI:<br>NR<br>Smoking: NR<br>DM: NR<br>Albumin: NR<br>Tumor location:<br>Upper: 31 (11.4)<br>Mid: 171 (63.1)<br>Lower: 69 (25.5)<br>Clinical stage:I:<br>83 (30.6)<br>II: 86 (31.7)<br>III: 67 (24.7)<br>IV: 35 (12.9)<br>Neoadjuvant<br>therapy: 28<br>(10.3)<br>Squamous cell:271<br>(100) |                                                                                            | Matched OR<br>time: 244.5<br>(60.4)<br>Thoracic time:85<br>(27.8)<br>EBL: 210.7<br>(86.8)<br>Thoracic<br>conversion: 2<br>(0.7)<br>Total LN<br>harvest: 20.3<br>(9.9)<br>Abdominal<br>LN: 7.9 (4.8)<br>Thoracic LN:<br>12.4 (7)<br>RLN LN: 4.8<br>(3.3)<br>Negative<br>margins: 255<br>(94.1) | Matched<br>OR time: 276<br>(59.4)<br>Thoracic time:<br>102.9 (28.6)<br>EBL: 209.6<br>(107.4)<br>Thoracic<br>conversion: 16<br>(5.9)<br>Total LN<br>harvest: 19.2<br>(9.6)<br>Abdominal LN:<br>6.8 (3.6)<br>Thoracic LN:12.4<br>(6.5)<br>RLN LN: 4.1 (3)<br>Negative<br>margins: 254<br>(93.7) |
| Yun, 2019 <sup>20</sup> N<br>Retrospective<br>(prospective database)Y<br>1 surgeon/1 institution  | Open (Ivor Lewis<br>54.4%; McKeown<br>45.6%) vs robot-<br>assisted (Ivor Lewis<br>57.1%; McKeown<br>42.9%) (abdominal<br>portion was either | Matched<br>(Inverse<br>probability of<br>treatment<br>weighting) N:<br>241<br>Age: 63 (7.8) | Matched<br>(Inverse<br>probability of<br>treatment<br>weighting) N:<br>130<br>Age: 63 (8.6)                                                                                                                                                                                                                                                                                                                            |                                                                                                                                                                                                                                                                                                                                                                                                                                  | Unadjusted<br>OR time: 240<br>(48.9)<br>EBL: 93.8<br>(140.9)<br>LN harvest: 38.3<br>(12.9) | Unadjusted<br>OR time:<br>275.6 (71.1)<br>EBL: 110.8<br>(125.8)<br>Conversion: 3<br>(2.3)                                                                                                                                                                                                     |                                                                                                                                                                                                                                                                                               |

|                                                                                |                                                                                  |                                                                                                                                                                                                                                                                                             |                                                                                                                                                                                                                                                                                                              |                                                                                                                                                                                                                                                                                                                         |                                                                           |                                                                                                                                                                                                                                          |                                                                                                                                                                                                                                                        |
|--------------------------------------------------------------------------------|----------------------------------------------------------------------------------|---------------------------------------------------------------------------------------------------------------------------------------------------------------------------------------------------------------------------------------------------------------------------------------------|--------------------------------------------------------------------------------------------------------------------------------------------------------------------------------------------------------------------------------------------------------------------------------------------------------------|-------------------------------------------------------------------------------------------------------------------------------------------------------------------------------------------------------------------------------------------------------------------------------------------------------------------------|---------------------------------------------------------------------------|------------------------------------------------------------------------------------------------------------------------------------------------------------------------------------------------------------------------------------------|--------------------------------------------------------------------------------------------------------------------------------------------------------------------------------------------------------------------------------------------------------|
| N<br>N                                                                         | robot-assisted or laparoscopic)                                                  | Male: 93%<br>BMI: 23.4 (2.8)<br>ASA: NR<br>CCI: NR<br>Smoking: 89.9%<br>DM: 14.2%<br>Albumin: NR<br>Tumor location:<br>Upper: 29.6%<br>Mid: 48.3%<br>Lower: 22.1%<br>Clinical Stage:I:<br>60.6%<br>II: 21.3%<br>III: 18.1%<br>Neoadjuvant treatment: 32.9%<br>Squamous cell carcinoma: 100% | Male: 92.6%<br>BMI: 23.4 (3.3)<br>ASA: NR CCI:<br>NR<br>Smoking: 81.9%<br>DM: 14.4%<br>Albumin: NR<br>Tumor location:<br>Upper: 27.5%<br>Mid: 45.4%<br>Lower: 27.1%<br>Clinical Stage:I:<br>66.5%<br>II: 18.1%<br>III: 15.4%<br>Neoadjuvant treatment: 25.5%<br>Squamous cell carcinoma: 100%                |                                                                                                                                                                                                                                                                                                                         | Margins positive:<br>3.3%<br>R0: 233 (96.7)<br>R1: 7 (2.9)<br>R2: 1 (0.4) | LN harvest:<br>39.1 (13.8)<br>Margins positive: 2.3%<br>R0: 127 (97.7)<br>R1: 3 (2.3)<br>R2: 0                                                                                                                                           |                                                                                                                                                                                                                                                        |
| Zhang, 2019 <sup>21</sup> N<br>RetrospectiveY<br>1 surgeon/1 institutionN<br>N | Robot-assisted Ivor-Lewis (abdomen and thorax robot) vs thoracoscopic Ivor-Lewis |                                                                                                                                                                                                                                                                                             | MatchedN:<br>66<br>Age: 62.3 (7.8)<br>Male: 50 (75.8)<br>BMI: 22.9 (3.1)ASA:<br>1: 30 (45.5)<br>2: 33 (50)<br>3: 3 (4.5)<br>Comorbidity: 28 (42.2)<br>Smoking history:33 (50)<br>DM: NR<br>Albumin: NR<br>Tumor location:<br>Mid: 29 (43.9)<br>Lower: 37 (56.1)<br>Neoadjuvant therapy: 0<br>Adenocarcinoma: | Matched<br>N: 66<br>Age: 62 (7.8)<br>Male: 50 (75.8)<br>BMI: 23.1 (4.5)<br>ASA:<br>1: 26 (39.4)<br>2: 36 (54.5)<br>3: 4 (6.1)<br>Comorbidity: 32 (48.5)<br>Smoking history:<br>42 (63.6) DM:<br>NR<br>Albumin: NR<br>Tumor location:<br>Mid: 26 (39.4)<br>Lower: 40 (60.6)<br>Neoadjuvant therapy: 0<br>Adenocarcinoma: |                                                                           | Matched<br>OR time: 302 (62.9)<br>EBL: 200 (100-262.5)<br>Conversion: 1 (1.5)<br>LN harvest:<br>19.2 (9.2)<br>Abd LN harvest: 8.9 (6.7)<br>Thoracic LN harvest: 10.3 (5.8)<br>R RLN LN harvest: 1.4 (1.6)<br>L RLN LN harvest: 1.3 (1.9) | Matched OR<br>time: 274.7 (38)<br>EBL: 200 (150-245)<br>Conversion: 0<br>LN harvest: 19.3 (9.5)<br>Abd LN harvest: 7.3 (5.9)<br>Thoracic LN harvest: 11.9 (8.3)<br>R RLN LN harvest: 1.6 (2.8)L<br>RLN LN harvest: 0.9 (1.9)<br>Margins positive:<br>0 |

|  |  |  |                                       |                                         |  |                     |  |
|--|--|--|---------------------------------------|-----------------------------------------|--|---------------------|--|
|  |  |  | 0<br>Squamous cell carcinoma: 64 (97) | 0<br>Squamous cell carcinoma: 65 (98.5) |  | Margins positive: 0 |  |
|--|--|--|---------------------------------------|-----------------------------------------|--|---------------------|--|

**Short and long-term outcomes**

| Author, Year            | Comparisons (e.g., open vs robot Ivor-Lewis; VATSvs robot McKeown, etc.)                                             | Short-Term Outcomes                                                                                                                                                                                                                          |                                                                                                                                                                         |                                                                                                                                                                                                     | Long-Term Outcomes                                                             |       |                                   |
|-------------------------|----------------------------------------------------------------------------------------------------------------------|----------------------------------------------------------------------------------------------------------------------------------------------------------------------------------------------------------------------------------------------|-------------------------------------------------------------------------------------------------------------------------------------------------------------------------|-----------------------------------------------------------------------------------------------------------------------------------------------------------------------------------------------------|--------------------------------------------------------------------------------|-------|-----------------------------------|
|                         |                                                                                                                      | Open                                                                                                                                                                                                                                         | Robot                                                                                                                                                                   | Other minimally-invasive approach                                                                                                                                                                   | Open                                                                           | Robot | Other minimally-invasive approach |
|                         |                                                                                                                      | LOS, mean days (SD)<br>Readmissions, (%)<br>ICU stay<br>Pulmonary complications (pneumonia, pneumothorax, PE, ARDS, pleural effusion)<br>Chylothorax<br>MACE<br>Anastomotic leak, N (%)<br>Reoperations, N (%) RLN palsy<br>Mortality, N (%) |                                                                                                                                                                         |                                                                                                                                                                                                     | Quality of life Overall survival<br>Cancer-specific survival<br>Follow up time |       |                                   |
| Chao, 2018 <sup>1</sup> | McKeown (transthoracic robot + laparoscopic) vs McKeown (VATS + laparoscopic). Stapled cervical anastomosis forboth. |                                                                                                                                                                                                                                              | Matched<br>LOS: 16.36 (5.79)<br>Readmissions: 5 (14.7)<br>ICU stay (hours): 31.85 (18.22)<br>Pneumonia: 2 (5.9)<br>Pleural effusion:4 (11.8)<br>30-day mortality: 0 (0) | Matched LOS: 17.82 (5.76)<br>Readmissions: 4 (11.8)<br>ICU stay (hours): 35.62 (47.33)<br>Pneumonia: 6 (17.6)<br>Pleural effusion: 6 (17.6)<br>30-day mortality: 0 (0)<br>90-day mortality: 1 (2.9) |                                                                                | NR    | NR                                |



|                         |                                                                    |  |                                                                                                                                                                                                                                                                                     |                                                                                                                                                                                                                                                                                   |  |    |    |
|-------------------------|--------------------------------------------------------------------|--|-------------------------------------------------------------------------------------------------------------------------------------------------------------------------------------------------------------------------------------------------------------------------------------|-----------------------------------------------------------------------------------------------------------------------------------------------------------------------------------------------------------------------------------------------------------------------------------|--|----|----|
|                         |                                                                    |  | 90-day mortality: 0 (0)<br>Anastomotic leak: 0 (0)<br>Reoperations: NR<br>RLN palsy: 7 (20.6)                                                                                                                                                                                       | Anastomotic leak:2 (5.9)<br>Reoperations: NR<br>RLN palsy: 10 (29.4)                                                                                                                                                                                                              |  |    |    |
| Chen, 2019 <sup>2</sup> | Robotic McKeownvs MIE (laparoscopy & VATS) McKeown                 |  | Matched<br>LOS: 17.1 (10.1)<br>Readmissions: NR<br>ICU stay: 4 (6.3)<br>Pneumonia: 8 (14.8)<br>Chylothorax: 1 (1.9)<br>MACE: 2 (3.7)<br>Anastomotic leak: 5 (9.3)<br>Hoarseness/RLN palsy: 7 (13)<br>Mortality: 0<br>Total expense: \$25,300 (9,000)<br>Expenses/day: \$1,700 (700) | Matched<br>LOS: 15.2 (9.8)<br>Readmissions: NR<br>ICU stay: 2.5 (3.7)<br>Pneumonia: 13 (24.1)<br>Chylothorax: 2 (3.7)<br>MACE: 0<br>Anastomotic leak:2 (3.7)<br>Hoarseness/RLN palsy: 17 (31.5)<br>Mortality: 0<br>Total expense: \$20,800 (9,000)<br>Expenses/day: \$1,500 (400) |  | NR | NR |
| Deng, 2018 <sup>3</sup> | Robot McKeown (abd and thoracic portions) vs thoracoscopic McKeown |  | Matched<br>LOS: 14.3 (6.9)<br>Total major complications:15 (28.8)<br>Grade 1-2 complications: 9 (17.3)<br>Grade 3+ complications: 6 (11.5)<br>Pneumonia: 5 (9.6)                                                                                                                    | Matched LOS: 12.7 (7.7)<br>Total major complications: 12 (23.1)<br>Grade 1-2 complications: 6 (11.5)<br>Grade 3+ complications: 6 (11.5)<br>Pneumonia: 4 (7.7)<br>Chylothorax: 1                                                                                                  |  | NR | NR |

|                                     |                                                   |                                                                                                                                                     |                                                                                                                                                    |                                                                                                                                                    |                                                      |                                                      |                                                      |
|-------------------------------------|---------------------------------------------------|-----------------------------------------------------------------------------------------------------------------------------------------------------|----------------------------------------------------------------------------------------------------------------------------------------------------|----------------------------------------------------------------------------------------------------------------------------------------------------|------------------------------------------------------|------------------------------------------------------|------------------------------------------------------|
|                                     |                                                   |                                                                                                                                                     | Chylothorax: 0<br>Anastomotic leak: 3 (5.8)<br>RLN palsy: 7 (13.5)<br>In-hospital mortality: 1 (1.9)<br>90-day mortality: 2 (3.8)                  | (1.9)<br>Anastomotic leak: 2 (3.8)<br>RLN palsy: 4 (7.7)<br>In-hospital mortality: 2 (3.8)<br>90-day mortality: 2 (3.8)                            |                                                      |                                                      |                                                      |
| Espinoza-Mercado, 2019 <sup>4</sup> | Robot-assisted vs minimally invasive vs open      | Readmission: 239 (6.9)<br>LOS (med, IQR): 10 (8-15)<br>30-day mortality: 130 (3.7)<br>90-day mortality: 259 (7.4)                                   | Readmission: 26 (6.1)<br>LOS (med, IQR): 9 (7-14)<br>30-day mortality: 18 (4.2)<br>90-day mortality: 35 (8.2)                                      | Readmission: 96 (6.2)<br>LOS (med, IQR): 9 (8-14)<br>30-day mortality: 50 (3.2)<br>90-day mortality: 114 (7.3)                                     | Overall survival (med, months; 95% CI): 43.6 (40-46) | Overall survival (med, months; 95% CI): 58.8 (47-69) | Overall survival (med, months; 95% CI): 47.5 (42-52) |
|                                     |                                                   | LOS (med, IQR): 10 (8-16)<br>Readmission: 25 (6.2)<br>ICU stay: NR<br>Complications: NR<br>30-day mortality: 20 (4.9)<br>90-day mortality: 32 (7.9) | LOS (med, IQR): 9 (7-14)<br>Readmission: 24 (6.1)<br>ICU stay: NR<br>Complications: NR<br>30-day mortality: 16 (3.9)<br>90-day mortality: 31 (7.6) | LOS (med, IQR): 9 (8-15)<br>Readmission: 20 (4.9)<br>ICU stay: NR<br>Complications: NR<br>30-day mortality: 13 (3.2)<br>90-day mortality: 25 (6.2) | Overall survival (med, months; 95% CI): 53.9 (42-85) | Overall survival (med, months; 95% CI): 58.8 (48-69) | Overall survival (med, months; 95% CI): 45.9 (33-58) |
| Gong, 2020 <sup>5</sup>             | Open vs total robotic vs thoracoscopic vs McKeown | LOS: 16.66 (9.3)<br>Reoperations: NR<br>ICU stay: NR<br>Total complications:                                                                        | LOS: 16.57 (8.0)<br>Reoperations: NR<br>ICU stay: NR<br>Total complications:                                                                       | LOS: 18.73 (13.29)<br>Reoperations: NR<br>ICU stay: NR<br>Total complications: 49 (34.03)                                                          | NR                                                   | NR                                                   | NR                                                   |

|                       |                                                                                                    |                                                                                                                                                                                                                                                                            |                                                                                                                                                                                                                                                                     |                                                                                                                                                                                                                                                             |  |    |    |
|-----------------------|----------------------------------------------------------------------------------------------------|----------------------------------------------------------------------------------------------------------------------------------------------------------------------------------------------------------------------------------------------------------------------------|---------------------------------------------------------------------------------------------------------------------------------------------------------------------------------------------------------------------------------------------------------------------|-------------------------------------------------------------------------------------------------------------------------------------------------------------------------------------------------------------------------------------------------------------|--|----|----|
|                       |                                                                                                    | 26 (33.77)<br>Pneumonia: 10 (12.99)<br>Atrial fibrillation: 10 (12.99)<br>Anastomoticleak: 2 (2.6)<br>Chylothorax: 3 (3.9)<br>Bleeding: 0<br>RLN palsy: 12 (15.58)<br>Wound infection: 2 (2.6) ICU readmission: 7 (9.09)<br>Reoperations:NR<br>Mortality (90-day): 2 (2.6) | 33 (36.26)<br>Pneumonia: 9 (9.89)<br>Atrial fibrillation: 13 (14.29)<br>Anastomoticleak: 4 (4.4)<br>Chylothorax: 1 (1.1)<br>Bleeding: 0<br>RLN palsy: 20 (21.98)<br>Wound infection: 1 (1.67) ICU readmission: 6 (6.59)<br>Reoperations:NR<br>Mortality (90-day): 0 | Pneumonia: 15 (10.42)<br>Atrial fibrillation:21 (14.58)<br>Anastomotic leak:10 (6.94)<br>Chylothorax: 1 (0.7)<br>Bleeding: 1 (0.7)<br>RLN palsy: 34 (23.61)<br>Wound infection: 0<br>ICU readmission: 12 (8.33)<br>Reoperations: NR<br>Mortality (90-day):0 |  |    |    |
| He, 2018 <sup>6</sup> | McKeown RAMIE (abdominal and thoracic portions) vs VAMIE (MIE for thoracic and abdominal portions) |                                                                                                                                                                                                                                                                            | LOS: 13.8 (2)<br>Overall complication rate: 10 (37)<br>Pulmonary complications: 5 (18.5)<br>Chylothorax: 0<br>Arrhythmia: 1 (3.7)<br>Anastomotic leak: 3 (11.1)<br>Bleeding: 1 (3.7)<br>RLN palsy: 4 (14.8)<br>90-day mortality: 0                                  | LOS: 12.8 (2.7)<br>Overall complication rate:9 (33.3)<br>Pulmonary complications: 2 (7.4)<br>Chylothorax: 1 (3.7)<br>Arrhythmia: 0<br>Anastomotic leak:1 (3.7)<br>Bleeding: 1 (3.7)<br>RLN palsy: 3 (11.1)<br>90-day mortality: 1 (3.7)                     |  | NR | NR |

|                          |                                                                                                                |                                                                                                                                                                                   |                                                                                                                                                                                                                                                                                                                                       |                                                                                                                                                                                                                                                                                                                                                |    |                                                                                                                        |                                                                                                                       |
|--------------------------|----------------------------------------------------------------------------------------------------------------|-----------------------------------------------------------------------------------------------------------------------------------------------------------------------------------|---------------------------------------------------------------------------------------------------------------------------------------------------------------------------------------------------------------------------------------------------------------------------------------------------------------------------------------|------------------------------------------------------------------------------------------------------------------------------------------------------------------------------------------------------------------------------------------------------------------------------------------------------------------------------------------------|----|------------------------------------------------------------------------------------------------------------------------|-----------------------------------------------------------------------------------------------------------------------|
| He, 2020 <sup>7</sup>    | robot-assisted esophagectomy and thoraco-laparoscopic esophagectomy                                            |                                                                                                                                                                                   | LOS (median):12 (5-78 range)<br>Readmissions: NR<br>ICU stay: 1.5 (1-24)<br>Pulmonary complications:18<br>Chylothorax: 2<br>MACE: NR<br>Mortality: 2<br>Anastomic leak:7<br>All complications: 30 (32.6)<br>Complications: Grade $\geq$ 2 directly related to surgery: NR<br>Grade >2 overall: NR<br>Reoperations: NR<br>RLN palsy: 6 | LOS (median): 13 (8-125) range<br>Readmissions: NR<br>ICU stay: 1.5 (1-20)<br>Pulmonary complications: 24<br>Chylothorax: 2<br>MACE: NR<br>Mortality: 1<br>Anastomotic leak:9<br>All complications:38 (39.6)<br>Complications: Grade $\geq$ 2 directly related to surgery: NR<br>Grade $\geq$ 2 overall:NR<br>Reoperations: NR<br>RLN palsy: 9 |    | Overall survival: NR<br>Recurrence: 14<br>Recurrence free:1 yr: 92.4<br>3 yr: 87.3<br>Median recurrence time:15 (9-42) | Overall survival: NR<br>Recurrence: 25<br>Recurrence free:1 yr: 81.7<br>3 yr: 67.9<br>Median recurrence time:9 (3-42) |
| Jeong, 2016 <sup>8</sup> | Robot: 3 hole or 3 field (laparotomy; only throacic portion is robotic)<br>Open: Ivor-Lewis,3-hole, or 3-field | LOS (med/IQR): 13 (12-16)<br>ICU stay (hours; med/IQR): 1.9 (1.8-2)<br>Complications(at least 1): 56 (35)<br>Pneumonia: 11 (7)<br>Anastomoticleak: 3 (2)<br>Afib: 9 (6)Vocal cord | LOS (med/IQR): 12 (10-15)<br>ICU stay (hours; med/IQR): 1.8 (1.8-1.9)<br>Complications(at least 1): 14 (16)<br>Pneumonia: 3 (3.4)<br>Anastomoticleak: 1 (1.1)<br>Afib: 2 (2.3)<br>Vocal cord                                                                                                                                          |                                                                                                                                                                                                                                                                                                                                                | NR | NR                                                                                                                     |                                                                                                                       |

|                              |                                                                                                                                                                      |                                                                                                                                                                                                                                                                                              |                                                                                                                                                                                                                                                                                  |                                                                                                                                                                                                                                                                        |  |    |    |
|------------------------------|----------------------------------------------------------------------------------------------------------------------------------------------------------------------|----------------------------------------------------------------------------------------------------------------------------------------------------------------------------------------------------------------------------------------------------------------------------------------------|----------------------------------------------------------------------------------------------------------------------------------------------------------------------------------------------------------------------------------------------------------------------------------|------------------------------------------------------------------------------------------------------------------------------------------------------------------------------------------------------------------------------------------------------------------------|--|----|----|
|                              |                                                                                                                                                                      | palsy: 1 (0.6)<br>Death: 1 (0.6)                                                                                                                                                                                                                                                             | palsy: 1 (1.1)<br>Death: 1 (1.1)                                                                                                                                                                                                                                                 |                                                                                                                                                                                                                                                                        |  |    |    |
| Meredith, 2019 <sup>9</sup>  | Six approaches compared. The only robotic approach is Ivor-Lewis. Comparable methods using other approaches in this study are open Ivor-Lewis and MIE transthoracic. | LOS (med/range): 10 (1-115)<br>Complication rate: 145 (30.5)<br>Pulmonary complication: 81 (17.1)<br>Pneumonia: 72 (15.2)<br>PE: 9 (1.9)<br>Chylothorax: 5 (1.1)<br>MI: 6 (1.3)<br>Arrhythmia: 55 (11.6)<br>Anastomotic leak: 23 (4.8)<br>Reoperation: 12 (2.5)<br>90-day mortality: 7 (1.5) | LOS (med/range): 10 (4-66)<br>Complication rate: 34 (23.6)<br>Pulmonary complication: 14 (9.7)<br>Pneumonia: 10 (6.9)<br>PE: 3 (3.2)<br>Chylothorax: 1 (0.7)<br>MI: 1 (0.7)<br>Arrhythmia: 25 (17.4)<br>Anastomotic leak: 4 (2.8)<br>Reoperation: 0<br>90-day mortality: 2 (1.4) | LOS (med/range): 9 (6-60)<br>Complication rate: 28 (29.5)<br>Pulmonary complication: 18 (18.9)<br>Pneumonia: 8 (8.4)<br>Chylothorax: 1 (1.1)<br>MI: 3 (3.2)<br>Arrhythmia: 17 (17.9)<br>Anastomotic leak: 4 (4.2)<br>Reoperation: 2 (2.1)<br>90-day mortality: 2 (2.1) |  | NR | NR |
| Motoyama, 2019 <sup>10</sup> | Robot: transthoracic (unclear how abdominal portion was performed)<br><br>MIE: transthoracic (unclear how abdominal portion was performed)                           |                                                                                                                                                                                                                                                                                              | Chylothorax: 1 (5)<br>Pneumonia: 0<br>Anastomotic leak: 1 (5)<br>Right RLN palsy: 2 (10)<br>Left RLN palsy: 5 (24)                                                                                                                                                               | Chylothorax: 1 (3)<br>Pneumonia: 0<br>Anastomotic leak: 3 (8)<br>Right RLN palsy: 12 (32)<br>Left RLN palsy: 18 (47)                                                                                                                                                   |  | NR | NR |

|                              |                                                                                                                                |                                                                                                                                          |                                                                                                                                                                                                                                                                                                                                                                    |                                                                                                                                                                                                                                                                                                                                                                                              |    |    |  |
|------------------------------|--------------------------------------------------------------------------------------------------------------------------------|------------------------------------------------------------------------------------------------------------------------------------------|--------------------------------------------------------------------------------------------------------------------------------------------------------------------------------------------------------------------------------------------------------------------------------------------------------------------------------------------------------------------|----------------------------------------------------------------------------------------------------------------------------------------------------------------------------------------------------------------------------------------------------------------------------------------------------------------------------------------------------------------------------------------------|----|----|--|
| Naffouje, 2019 <sup>11</sup> | Open vs MIE (robot and all other MIE)<br>Ivor-Lewis Secondary analysis compared laparoscopic vs robotic (2:1 propensity match) |                                                                                                                                          | LOS (median, IQR): 7 (7-9.5)<br>Readmissions: 6 (14.6)<br>Pneumonia: 3 (7.3)<br>PE: 1 (2.4)<br>Transfusion: 1 (2.4)<br>Reintubation: 4 (9.8)<br>Superficial SSI: 0<br>Deep SSI: 0<br>Organ space SSI: 3 (7.3)<br>Overall complications (patients with at least one complication): 12 (29.3)<br>Mortality: 0<br>Anastomotic leak: 6 (14.6)<br>Reoperation: 5 (12.2) | LOS (median, IQR): 8 (7-12.25)<br>Readmissions: 12 (14.6)<br>Pneumonia: 16 (19.5)<br>PE: 2 (2.4)<br>Transfusion: 2 (2.4)<br>Reintubation: 9 (11)<br>Superficial SSI: 2 (2.4)<br>Deep SSI: 1 (1.2)<br>Organ space SSI: 14 (17.1)<br>Overall complications (patients with at least one complication): 28 (34.6)<br>Mortality: 2 (2.4)<br>Anastomotic leak: 17 (20.7)<br>Reoperation: 15 (18.3) |    |    |  |
| Osaka, 2018 <sup>12</sup>    | Robot (thoracic) with unknown method for abdomen vs. thoracotomy and unknown for abdomen                                       | LOS (med, range): 30 (22-35)<br>Pulmonary complications: 3 (10)<br>Anastomotic leak: 6 (20)<br>SSI: 3 (10)<br>Vocal cord palsy: 5 (16.7) | LOS (med, range): 17 (10-38)<br>Pulmonary complications: 2 (6.7)<br>Anastomotic leak: 3 (10)<br>SSI: 0<br>Vocal cord palsy: 5 (16.7)                                                                                                                                                                                                                               |                                                                                                                                                                                                                                                                                                                                                                                              | NR | NR |  |

|                          |                                                                                                                                                                                                                                                                        |                                                                                                                                                                                                                                                                                                       |                                                                                                                                                                                                                                                                                               |                                                                                                                                                                                                                                      |    |                                                                                                                                                             |                                                                                                                                                             |
|--------------------------|------------------------------------------------------------------------------------------------------------------------------------------------------------------------------------------------------------------------------------------------------------------------|-------------------------------------------------------------------------------------------------------------------------------------------------------------------------------------------------------------------------------------------------------------------------------------------------------|-----------------------------------------------------------------------------------------------------------------------------------------------------------------------------------------------------------------------------------------------------------------------------------------------|--------------------------------------------------------------------------------------------------------------------------------------------------------------------------------------------------------------------------------------|----|-------------------------------------------------------------------------------------------------------------------------------------------------------------|-------------------------------------------------------------------------------------------------------------------------------------------------------------|
| Park, 2016 <sup>13</sup> | <p>Transthoracic robotvs transthoracic VATS. In the robotcohort, 90% were Ivor-Lewis. Abdominal portion in the robotic cohortwas done robotically in 58%. In the MIE cohort, abdominal portion was laparoscopic in 49%, 19% were Ivor-Lewis, and 81% were McKeown.</p> |                                                                                                                                                                                                                                                                                                       | <p>LOS: NR<br/>Readmissions:NR<br/>ICU stay: NR<br/>Pulmonary complication: 9 (14.5)<br/>Anastomoticleak: 5 (8.1)<br/>RLN palsy: 8 (12.9)<br/>Complication <math>\geq</math> Clavien Dindo IIIa: 10 (16.1)<br/>30-day mortality: 1 (1.6)</p>                                                  | <p>LOS: NR<br/>Readmissions: NR<br/>ICU stay: NR<br/>Pulmonary complication: 6 (14)<br/>Anastomotic leak:1 (2.3)<br/>RLN palsy: 10 (23.8)<br/>Complication <math>\geq</math> Clavien Dindo IIIa:9 (20.9)<br/>30-day mortality: 0</p> |    | <p>Median follow-up: 17 months<br/>5-year survival: 69%<br/>5-year freedom of locoregional recurrence: 88%<br/>5-year freedom of distal recurrence: 72%</p> | <p>Median follow-up: 26 months<br/>5-year survival: 59%<br/>5-year freedom of locoregional recurrence: 74%<br/>5-year freedom of distal recurrence: 71%</p> |
| Rolf, 2017 <sup>14</sup> | <p>Open Ivor-Lewis vs Hybrid minimally-invasive Ivor-Lewis (Robot in abdomen + thoracotomy)</p>                                                                                                                                                                        | <p>LOS (med, range): 11.5 (8-101)<br/>Complications (Clavien-Dindo):<br/><math>\geq 1</math>: 122 (76)<br/><math>\geq 2</math>: 91 (57)<br/><math>\geq 3</math>: 51 (32)<br/>Pulmonary complications:81 (51)<br/>Anastomotic leak: 11 (7)<br/>30-day mortality: 3 (2)<br/>90-day mortality: 5 (3)</p> | <p>LOS (med, range): 10 (8-69)<br/>Complications (Clavien- Dindo):<br/><math>\geq 1</math>: 37 (65)<br/><math>\geq 2</math>: 22 (39)<br/><math>\geq 3</math>: 14 (25)<br/>Pulmonary complications:24 (43)<br/>Anastomotic leak: 4 (7)<br/>30-day mortality: 0<br/>90-day mortality: 3 (5)</p> |                                                                                                                                                                                                                                      | NR | NR                                                                                                                                                          |                                                                                                                                                             |

|                              |                                                                                                                                                                                            |                                                                                                                                                                                                                                                                                                                                                                      |                                                                                                                                                                                                                                                                                                                                                                   |                                                                                                                                                                                            |                                                                                                              |                                                                                                              |    |
|------------------------------|--------------------------------------------------------------------------------------------------------------------------------------------------------------------------------------------|----------------------------------------------------------------------------------------------------------------------------------------------------------------------------------------------------------------------------------------------------------------------------------------------------------------------------------------------------------------------|-------------------------------------------------------------------------------------------------------------------------------------------------------------------------------------------------------------------------------------------------------------------------------------------------------------------------------------------------------------------|--------------------------------------------------------------------------------------------------------------------------------------------------------------------------------------------|--------------------------------------------------------------------------------------------------------------|--------------------------------------------------------------------------------------------------------------|----|
| Sarkaria, 2019 <sup>15</sup> | <p>Robotic Ivor Lewis (62/64) and McKeown (2/64) vs open Ivor Lewis (103/106) Thoracoabdominal (3/106)</p> <p>"All but 1 patient who underwent MIE did so via a total RAMIE approach."</p> | <p>Readmissions:17 (16)<br/>LOS (med, range): 11 (6-131)<br/>ICU admission:19 (19.8)<br/>Complication (≥ grade 3): 55 (51.9)<br/>Pulmonary complication: 36 (34)<br/>Chylothorax: 1 (0.9)<br/>MACE (afib): 2 (1.9)<br/>Infection (any):38 (35.8)<br/>Anastomotic leak: 10 (9.4)<br/>RLN palsy: 0 (0)<br/>30-day mortality: 2 (1.9)<br/>90-day mortality: 4 (3.8)</p> | <p>Readmissions:13 (20.4)<br/>LOS (med, range): 9 (5-17)<br/>ICU admission:5 (7.8)<br/>Complication (≥ grade 3): 25 (39.1)<br/>Pulmonary complication: 9 (14.1)<br/>Chylothorax: 0 (0)<br/>MACE (afib): 1 (1.6)<br/>Infection (any):11 (17.2)<br/>Anastomoticleak: 2 (3.1)<br/>RLN palsy: 2 (3.1)<br/>30-day mortality: 1 (1.6)<br/>90-day mortality: 1 (1.6)</p> |                                                                                                                                                                                            | <p>Functional Assessment of Cancer Therapy– Esophageal (FACT-E): no difference between surgical approach</p> | <p>Functional Assessment of Cancer Therapy– Esophageal (FACT-E): no difference between surgical approach</p> |    |
| Tagkalos, 2019 <sup>16</sup> | <p>Robot (thoracic and abdominal) Ivor-Lewis vs. minimally-invasive(VATS and laparoscopy) Ivor-Lewis</p>                                                                                   |                                                                                                                                                                                                                                                                                                                                                                      | <p>Matched LOS (med, range): 12 (7-59)<br/>ICU stay (med, range): 1 (1-43)<br/>Pneumonia: 6 (15)<br/>Anastomotic leak: 5 (12.5)<br/>Wound infection: 0<br/>30-day</p>                                                                                                                                                                                             | <p>Matched LOS (med, range): 12.5 (9-54)<br/>ICU stay (med,range): 2 (1-17)<br/>Pneumonia: 7 (17.5)<br/>Anastomotic leak:5 (12.5)<br/>Wound infection: 1 (2.5)<br/>30-day mortality: 1</p> |                                                                                                              | NR                                                                                                           | NR |



|                                   |                                                                                                       |                                                                                                                                                                                                                                                                                                                                                                                                                                                                                                 |                                                                                                                                                                                                                                                                                                                                                                                                                                                                                                              |                                       |                                                                                                                                                                       |                                                                                                                                                                        |  |
|-----------------------------------|-------------------------------------------------------------------------------------------------------|-------------------------------------------------------------------------------------------------------------------------------------------------------------------------------------------------------------------------------------------------------------------------------------------------------------------------------------------------------------------------------------------------------------------------------------------------------------------------------------------------|--------------------------------------------------------------------------------------------------------------------------------------------------------------------------------------------------------------------------------------------------------------------------------------------------------------------------------------------------------------------------------------------------------------------------------------------------------------------------------------------------------------|---------------------------------------|-----------------------------------------------------------------------------------------------------------------------------------------------------------------------|------------------------------------------------------------------------------------------------------------------------------------------------------------------------|--|
|                                   |                                                                                                       |                                                                                                                                                                                                                                                                                                                                                                                                                                                                                                 | mortality: 0<br>90-day<br>mortality: 2 (5)                                                                                                                                                                                                                                                                                                                                                                                                                                                                   | (2.5)<br>90-day mortality: 1<br>(2.5) |                                                                                                                                                                       |                                                                                                                                                                        |  |
| van der Sluis, 2019 <sup>17</sup> | Open McKeown v<br>Robot transthoracic<br>with laparoscopic<br>abdominal and open<br>cervical portions | Readmissions: 4<br>(7.3)<br>LOS (median):16<br>ICU stay: 1<br>(median) Grade<br>>2<br>complications<br>overall: 44 (80)<br>Grade >2<br>complications<br>directly related<br>to surgery: 44<br>(80)<br>Pulmonary<br>complications:32<br>(58)<br>Chylothorax: 12<br>(22)<br>MACE: 26 (47)<br>30-day mortality:<br>0 (0) 60-day<br>mortality: 1 (2)<br>90-day mortality:<br>1 (2) Anastomic<br>leak:11 (20)<br>RLN injury: 6<br>(11)<br>Reoperations: 18<br>(32.7)<br>Health-related<br>QOL (6wk): | Readmissions: 6<br>(11.1)<br>LOS (median):14<br>ICU stay: 1<br>(median) Grade<br>>2<br>complications<br>overall: 34 (63)<br>Grade >2<br>complications<br>directly related<br>to surgery: 32<br>(59)<br>Pulmonary<br>complications:17<br>(32)<br>Chylothorax: 17<br>(31.5)<br>MACE: 17 (22)<br>30-day<br>mortality: 1 (2)<br>60-day<br>mortality: 3 (6)<br>90-day<br>mortality: 5 (9)<br>Anastomotic<br>leak: 13 (24.1)<br>RLN injury: 5<br>(9)<br>Reoperations: 13<br>(24.1)<br>Health-related<br>QOL (6wk): |                                       | Median follow-<br>up: 40 months<br>for all both arms<br>Median OS not<br>reached in either<br>arm (no<br>differences<br>between arms).<br><br>Median DFS:28<br>months | Median follow-<br>up: 40 months for<br>all both arms<br>Median OS not<br>reached in either<br>arm (no<br>differences<br>between arms).<br><br>Median DFS: 26<br>months |  |

|                                |                                                                    |                                                                      |                                                                                                                                                                                                                                                                                                                                 |                                                                                                                                                                                                                                                                                                                                                                                    |  |                                                                                                                                                                                                                                           |                                                                                                                                                                                                                                             |
|--------------------------------|--------------------------------------------------------------------|----------------------------------------------------------------------|---------------------------------------------------------------------------------------------------------------------------------------------------------------------------------------------------------------------------------------------------------------------------------------------------------------------------------|------------------------------------------------------------------------------------------------------------------------------------------------------------------------------------------------------------------------------------------------------------------------------------------------------------------------------------------------------------------------------------|--|-------------------------------------------------------------------------------------------------------------------------------------------------------------------------------------------------------------------------------------------|---------------------------------------------------------------------------------------------------------------------------------------------------------------------------------------------------------------------------------------------|
|                                |                                                                    | 57.6 (50.6-64.6)<br>Physical functioning<br>(6wk): 58.6<br>(51.1-66) | 68.7 (61.5-75.9)<br>Physical functioning<br>(6wk): 69.3<br>(61.6-76.9)                                                                                                                                                                                                                                                          |                                                                                                                                                                                                                                                                                                                                                                                    |  |                                                                                                                                                                                                                                           |                                                                                                                                                                                                                                             |
| Washington, 2019 <sup>18</sup> | Robotic vs laparoscopic transhiatal esophagectomy                  |                                                                      | LOS: 9.9 (4)<br>ICU stay: 1.7 (2.4)<br>Anastomotic leak: 1 (5.6)<br>Clavien Dindo $\geq 3$ : 2 (11.1)<br>Mortality: 0 (0)                                                                                                                                                                                                       | LOS: 9.8 (4.7)<br>ICU stay: 2.7 (6.1)<br>Anastomotic leak: 1 (5.6)<br>Clavien Dindo $>3$ : 1 (5.6)<br>Morality: 1 (5.6)                                                                                                                                                                                                                                                            |  | Median OS not reached in either arm.                                                                                                                                                                                                      |                                                                                                                                                                                                                                             |
| Yang, 2019 <sup>19</sup>       | Robot McKeown (abd and thoracic portions) vs thoracoscopic McKeown |                                                                      | Matched LOS (med, range): 11 (6-54)<br>ICU stay: 2 (0-15)<br>Reoperation: 4 (1.5)<br>Total complication: 122 (45)<br>Pneumonia: 24 (8.9)<br>Pleural effusion: 19 (7)<br>Pneumothorax: 7 (2.6)<br>Re-intubation/trach: 12 (4.4)<br>Empyema: 9 (3.3)<br>Arrhythmia: 9 (3.3)<br>Cardiac arrest: 0<br>GI bleeding: 0<br>Anastomotic | Matched LOS (med, range): 11 (4-94)<br>ICU stay: 1 (0-61)<br>Reoperation: 9 (3.3)<br>Total complication: 101 (37.3)<br>Pneumonia: 34 (12.5)<br>Pleural effusion: 31 (11.4)<br>Pneumothorax: 11 (4.1)<br>Re-intubation/trach: 12 (4.4)<br>Empyema: 11 (4.1)<br>Arrhythmia: 8 (3)<br>Cardiac arrest: 2 (0.7)<br>GI bleeding: 1 (0.4)<br>Anastomotic leak: 39 (14.4)<br>RLN palsy: 41 |  | Matched N: 255<br>Total recurrence: 30 (11.8)<br>Locoregional recurrence only: 9 (3.5)<br>Distal recurrence: 17 (6.7)<br>Locoregional and distal: 4 (1.6)<br>Mediastinal LN recurrence: 5 (2)<br>Median follow up (med, IQR): 17.2 (1-33) | Matched N: 254<br>Total recurrence: 26 (10.2)<br>Locoregional recurrence only: 10 (3.9)<br>Distal recurrence: 7 (2.8)<br>Locoregional and distal: 9 (3.6)<br>Mediastinal LN recurrence: 13 (5.3)<br>Median follow up (med, IQR): 9.3 (1-33) |

|                           |                                                                                                                                                          |                                                                                   |                                                                                                                                                                                                                                                               |                                                                                                                                                                                                                                                             |                                                                                          |                                                                                          |    |
|---------------------------|----------------------------------------------------------------------------------------------------------------------------------------------------------|-----------------------------------------------------------------------------------|---------------------------------------------------------------------------------------------------------------------------------------------------------------------------------------------------------------------------------------------------------------|-------------------------------------------------------------------------------------------------------------------------------------------------------------------------------------------------------------------------------------------------------------|------------------------------------------------------------------------------------------|------------------------------------------------------------------------------------------|----|
|                           |                                                                                                                                                          |                                                                                   | leak: 32 (11.8)<br>RLN palsy: 79 (29.2)<br>Wound infection: 2 (0.7)<br>Chyle leak: 4 (1.5)<br>90-day mortality: 0                                                                                                                                             | (15.1)<br>Wound infection: 2 (0.7)<br>Chyle leak: 2 (0.7)<br>90-day mortality: 2 (0.7)                                                                                                                                                                      |                                                                                          |                                                                                          |    |
| Yun, 2019 <sup>20</sup>   | Open (Ivor Lewis 54.4%; McKeown 45.6%) vs robot-assisted (Ivor Lewis 57.1%; McKeown 42.9%) (abdominal portion was either robot-assisted or laparoscopic) | Unadjusted LOS: 18.2 (15.4)<br>ICU stay: 1.36 (1.97)<br>30 day mortality: 4 (1.7) | Unadjusted LOS: 16.5 (9.8)<br>ICU stay: 1.08 (0.43)<br>30 day mortality: 0 (0)                                                                                                                                                                                |                                                                                                                                                                                                                                                             | IPTW-Adjusted 1-year disease-free survival: 53.2%<br>3-year disease-free survival: 45.6% | IPTW-Adjusted 1-year disease-free survival: 54.4%<br>3-year disease-free survival: 49.2% |    |
| Zhang, 2019 <sup>21</sup> | Robot-assisted Ivor-Lewis (abdomen and thorax robot) vs thoracoscopic Ivor-Lewis                                                                         |                                                                                   | LOS (med, IQR): 9 (8-12.3)<br>Total complications: 19 (28.8)<br>Pneumonia: 4 (6.1)<br>Chylothorax: 0<br>Anastomotic leak: 5 (7.6)<br>RLN palsy: 4 (6.1)<br>MACE: 5 (7.6)<br>Wound infection: 1 (1.5)<br>In-hospital mortality: 0<br>90-day mortality: 1 (1.5) | LOS (med, IQR): 9 (8-11.3)<br>Total complications: 16 (24.2)<br>Pneumonia: 5 (7.6)<br>Chylothorax: 1 (1.5)<br>Anastomotic leak: 3 (4.5)<br>RLN palsy: 3 (4.5)<br>MACE: 2 (3)<br>Wound infection: 0<br>In-hospital mortality: 0<br>90-day mortality: 1 (1.5) |                                                                                          | NR                                                                                       | NR |

**eTable 2. Operative Techniques of Included Studies**

| Author, year                        | Surgical Approach | Technique             | Abdomen      | Chest       | Anastomosis                            |
|-------------------------------------|-------------------|-----------------------|--------------|-------------|----------------------------------------|
| Chao, 2018 <sup>1</sup>             | RAMIE             | McKeown               | Laparoscopic | Robotic     | Circular stapled; cervical             |
|                                     | VAMIE             | McKeown               | Laparoscopic | VATS        | Circular stapled; cervical             |
| Chen, 2019 <sup>2</sup>             | RAMIE             | McKeown               | NR           | Robotic     | Circular stapled; cervical             |
|                                     | VAMIE             | McKeown               | Laparoscopic | VATS        | Circular stapled; cervical             |
| Deng, 2018 <sup>3</sup>             | RAMIE             | McKeown               | Robotic      | Robotic     | Circular stapled or handsewn; cervical |
|                                     | VAMIE             | McKeown               | Laparoscopic | VATS        | Circular stapled or handsewn; cervical |
| Espinoza-Mercado, 2019 <sup>4</sup> | RAMIE             | NR                    | NR           | NR          | NR                                     |
|                                     | VAMIE             | NR                    | NR           | NR          | NR                                     |
|                                     | Open              | NR                    | NR           | NR          | NR                                     |
| Gong, 2020 <sup>5</sup>             | RAMIE             | McKeown               | Robotic      | Robotic     | Circular stapled; cervical             |
|                                     | VAMIE             | McKeown               | Laparoscopic | VATS        | Circular stapled; cervical             |
|                                     | Open              | McKeown               | Laparotomy   | Thoracotomy | NR                                     |
| He, 2018 <sup>6</sup>               | RAMIE             | McKeown               | Robotic      | Robotic     | End to side circular stapled; cervical |
|                                     | VAMIE             | McKeown               | Laparoscopic | VATS        | End to side circular stapled; cervical |
| He, 2020 <sup>7</sup>               | RAMIE             | McKeown               | Robotic      | Robotic     | NR                                     |
|                                     | VAMIE             | McKeown               | Laparoscopic | VATS        | NR                                     |
| Jeong, 2016 <sup>8</sup>            | RAMIE             | McKeown               | Laparotomy   | Robotic     | Cervical                               |
|                                     | Open              | Ivor Lewis or McKeown | Laparotomy   | Thoracotomy | Cervical or thoracic                   |
| Meredith, 2019 <sup>9</sup>         | RAMIE             | Ivor Lewis            | NR           | NR          | NR                                     |
|                                     | VAMIE             | Ivor Lewis            | NR           | NR          | NR                                     |
|                                     | Open              | Ivor Lewis            | NR           | NR          | NR                                     |
| Motoyama, 2019 <sup>10</sup>        | RAMIE             | Ivor Lewis            | NR           | Robotic     | NR                                     |
|                                     | VAMIE             | Ivor Lewis            | NR           | VATS        | NR                                     |
| Naffouje, 2019 <sup>11</sup>        | RAMIE             | Ivor Lewis            | NR           | NR          | NR                                     |
|                                     | VAMIE             | Ivor Lewis            | NR           | NR          | NR                                     |

|                                      |        |                                                    |                               |              |                                                                  |
|--------------------------------------|--------|----------------------------------------------------|-------------------------------|--------------|------------------------------------------------------------------|
| Osaka, 2018 <sup>12</sup>            | RAMIE  | NR                                                 | NR                            | Robotic      | NR                                                               |
|                                      | Open   | NR                                                 | NR                            | Thoracotomy  | NR                                                               |
| Park, 2016 <sup>13</sup>             | RAMIE  | 90% McKeown<br>10% Ivor Lewis                      | 58% robotic<br>42% open*      | Robotic      | 90% cervical<br>10% thoracic                                     |
|                                      | VAMIE  | 81% McKeown<br>19% Ivor Lewis                      | 49% laparoscopic<br>51% open* | Laparoscopic | 81% cervical<br>19% thoracic                                     |
| Rolff, 2017 <sup>14</sup>            | Hybrid | Ivor Lewis                                         | Robotic                       | Thoracotomy  | NR                                                               |
|                                      | Open   | Ivor Lewis                                         | Laparotomy                    | Thoracotomy  | NR                                                               |
| Sarkaria, 2019 <sup>15</sup>         | RAMIE  | 62/64 Ivor Lewis;<br>2/64 McKeown                  | NR                            | NR           | NR                                                               |
|                                      | Open   | 103/106 open Ivor Lewis;<br>3/106 thoracoabdominal | NR                            | NR           | NR                                                               |
| Tagkalos, 2019 <sup>16</sup>         | RAMIE  | Ivor Lewis                                         | Robotic                       | Robotic      | Circular stapled;<br>intrathoracic                               |
|                                      | VAMIE  | Ivor Lewis                                         | Laparoscopic                  | VATS         | Circular stapled;<br>intrathoracic                               |
| van der Sluis,<br>2019 <sup>17</sup> | RAMIE  | McKeown                                            | Laparoscopic                  | Robotic      | End to side handsewn;<br>cervical                                |
|                                      | Open   | McKeown                                            | Laparotomy                    | Thoracotomy  | End to side handsewn;<br>cervical                                |
| Washington, 2019 <sup>18</sup>       | RAMIE  | Transhiatal                                        | Robotic                       | NA           | Cervical                                                         |
|                                      | VAMIE  | Transhiatal                                        | Laparoscopic                  | NA           | Cervical                                                         |
| Yang, 2019 <sup>19</sup>             | RAMIE  | McKeown                                            | Robotic                       | Robotic      | Cervical                                                         |
|                                      | VAMIE  | McKeown                                            | Laparoscopic                  | VATS         | Cervical                                                         |
| Yun, 2019 <sup>20</sup>              | RAMIE  | 57.1% Ivor Lewis<br>42.9% McKeown                  | Robotic or<br>Laparoscopic    | Robotic      | Circular stapled; cervical                                       |
|                                      | Open   | 54.4% Ivor Lewis<br>45.6% McKeown                  | Laparotomy                    | Thoracotomy  | Circular stapled; cervical                                       |
| Zhang, 2019 <sup>21</sup>            | RAMIE  | Ivor Lewis                                         | Robotic                       | Robotic      | End to end both circular<br>stapled + handsewn;<br>intrathoracic |
|                                      | VAMIE  | Ivor Lewis                                         | Laparoscopic                  | VATS         | End to end circular<br>stapled; intrathoracic                    |

**eTable 3.** Covariates for Propensity Matching in Studies Included in the Meta-analysis

| Study                                | Age | Sex | BMI, height, or weight | Comorbidity/ ASA | Tumor location | Neoadjuvant treatment | Clinical stage | Pathologic stage | Other covariates                                                                                                                              |
|--------------------------------------|-----|-----|------------------------|------------------|----------------|-----------------------|----------------|------------------|-----------------------------------------------------------------------------------------------------------------------------------------------|
| Chao et al, <sup>39</sup> 2018       | X   | X   |                        | X                |                | X                     | X              |                  | Recurrent laryngeal nerve nodal findings on preoperative computed tomography imaging                                                          |
| Chen et al, <sup>40</sup> 2019       | X   | X   | X                      | X                |                | X                     | X              |                  | History of smoking or alcohol consumption                                                                                                     |
| Deng et al, <sup>41</sup> 2019       | X   | X   | X                      | X                |                | N/A                   | X              |                  |                                                                                                                                               |
| Espinoza-Mercado, <sup>42</sup> 2019 | X   | X   |                        | X                | X              | X                     | X              |                  | Facility type, race, insurance type, median income quartile, education level, urban or rural status, year of diagnosis, histology, tumor size |
| He et al, <sup>45</sup> 2018         | X   | X   | X                      | X                | X              | N/A                   |                | X                | Forced expiratory volume in 1 second                                                                                                          |
| Naffouje, <sup>49</sup> 2019         | X   | X   | X                      | X                |                | X                     |                |                  | Significant weight loss (>10% in 6 months), type of malignancy                                                                                |
| Tagkalos, <sup>53</sup> 2019         | X   |     | X                      | X                | X              | X                     | X              |                  |                                                                                                                                               |
| Yang et al, <sup>56</sup> 2019       | X   | X   | X                      |                  | X              | X                     | X              | X                |                                                                                                                                               |
| Zhang, <sup>58</sup> 2019            | X   | X   | X                      | X                | X              | N/A                   |                | X                | Tumor size                                                                                                                                    |

**eTable 4. Publication Bias**

|                                 | <b>Egger regression test<br/>(p-value)</b> | <b>Begg rank correlation test<br/>(p-value)</b> |
|---------------------------------|--------------------------------------------|-------------------------------------------------|
| Lymph node harvest              | 0.712                                      | 0.920                                           |
| EBL                             | 0.442                                      | 0.275                                           |
| Anastomatic leak                | 0.431                                      | 0.260                                           |
| recurrent laryngeal nerve palsy | 0.169                                      | 0.381                                           |
| pulmonary complications         | 0.590                                      | 0.612                                           |
| total complications             | 0.330                                      | 0.719                                           |
| mortality                       | 0.892                                      | 0.920                                           |

**eTable 5. Risk of Bias**

**Risk of Bias (randomized trials)**

| Author, year                      | Random sequence generation | Allocation concealment | Blinding of participants and personnel | Blinding of outcome assessment | Incomplete outcome data       | Selective reporting | Other sources of bias |
|-----------------------------------|----------------------------|------------------------|----------------------------------------|--------------------------------|-------------------------------|---------------------|-----------------------|
| van der Sluis, 2019 <sup>17</sup> | O                          | O                      | O                                      | •                              | Short-term: 0<br>Long-term: 0 | O                   | O                     |
| He, 2020 <sup>7</sup>             | O                          |                        |                                        |                                | Short-term: 0<br>Long-term: 0 | O                   | O                     |

O = low risk of bias; • = risk of bias; ◐ = unknown

**ROBINS-I (observational studies)**

| Author, year                        | Confounding | Selection bias | Bias in measurement classification of interventions | Bias due to deviations from intended interventions | Bias due to missing data | Bias in measurement of outcomes | Bias in selection of the reported result | Other source of bias |
|-------------------------------------|-------------|----------------|-----------------------------------------------------|----------------------------------------------------|--------------------------|---------------------------------|------------------------------------------|----------------------|
| Chao, 2018 <sup>1</sup>             | Low         | Moderate       | Low                                                 | Low                                                | Low                      | Low                             | Low                                      | n/a                  |
| Chen, 2019 <sup>2</sup>             | Low         | Moderate       | Low                                                 | Low                                                | Low                      | Low                             | Low                                      | n/a                  |
| Deng, 2019 <sup>3</sup>             | Low         | Low            | Low                                                 | Low                                                | Low                      | Low                             | Low                                      | n/a                  |
| Espinoza-Mercado, 2019 <sup>4</sup> | Low         | Moderate       | Moderate                                            | Low                                                | Low                      | Low                             | Low                                      | n/a                  |
| Gong, 2020 <sup>5</sup>             | Serious     | Serious        | Low                                                 | Low                                                | Low                      | Low                             | Low                                      | n/a                  |
| He, 2018 <sup>6</sup>               | Low         | Moderate       | Low                                                 | Low                                                | Low                      | Low                             | Low                                      | n/a                  |
| Jeong, 2016 <sup>8</sup>            | Low         | Moderate       | Low                                                 | Low                                                | Low                      | Low                             | Low                                      | n/a                  |



|                                |          |          |     |     |                                                       |          |          |     |
|--------------------------------|----------|----------|-----|-----|-------------------------------------------------------|----------|----------|-----|
| Meredith, 2019 <sup>9</sup>    | Serious  | Serious  | Low | Low | Low                                                   | Low      | Low      | n/a |
| Motoyama, 2019 <sup>10</sup>   | Low      | Serious  | Low | Low | Low                                                   | Low      | Moderate | n/a |
| Naffouje, 2019 <sup>11</sup>   | Low      | Moderate | Low | Low | Low                                                   | Low      | Low      | n/a |
| Osaka, 2018 <sup>12</sup>      | Moderate | Serious  | Low | Low | Low                                                   | Low      | Moderate | n/a |
| Park, 2016 <sup>13</sup>       | Low      | Serious  | Low | Low | Short-term outcomes: Low; Long-term outcomes: Serious | Low      | Serious  | n/a |
| Rolff, 2017 <sup>14</sup>      | Serious  | Moderate | Low | Low | Low                                                   | Low      | Moderate | n/a |
| Sarkaria, 2019 <sup>15</sup>   | Low      | Moderate | Low | Low | Low                                                   | Moderate | Low      | n/a |
| Tagkalos, 2019 <sup>16</sup>   | Low      | Moderate | Low | Low | Low                                                   | Low      | Low      | n/a |
| Washington, 2019 <sup>18</sup> | Serious  | Moderate | Low | Low | Low                                                   | Low      | Serious  | n/a |
| Yang, 2019 <sup>19</sup>       | Low      | Low      | Low | Low | Short-term outcomes: Low; Long-term outcomes: Serious | Low      | Low      | n/a |
| Yun, 2019 <sup>20</sup>        | Low      | Moderate | Low | Low | Short-term outcomes: Low; Long-term outcomes: Serious | Low      | Low      | n/a |
| Zhang, 2019 <sup>21</sup>      | Moderate | Moderate | Low | Low | Low                                                   | Low      | Low      | n/a |

**eFIGURE 1. Forest Plot of Intraoperative Outcomes**

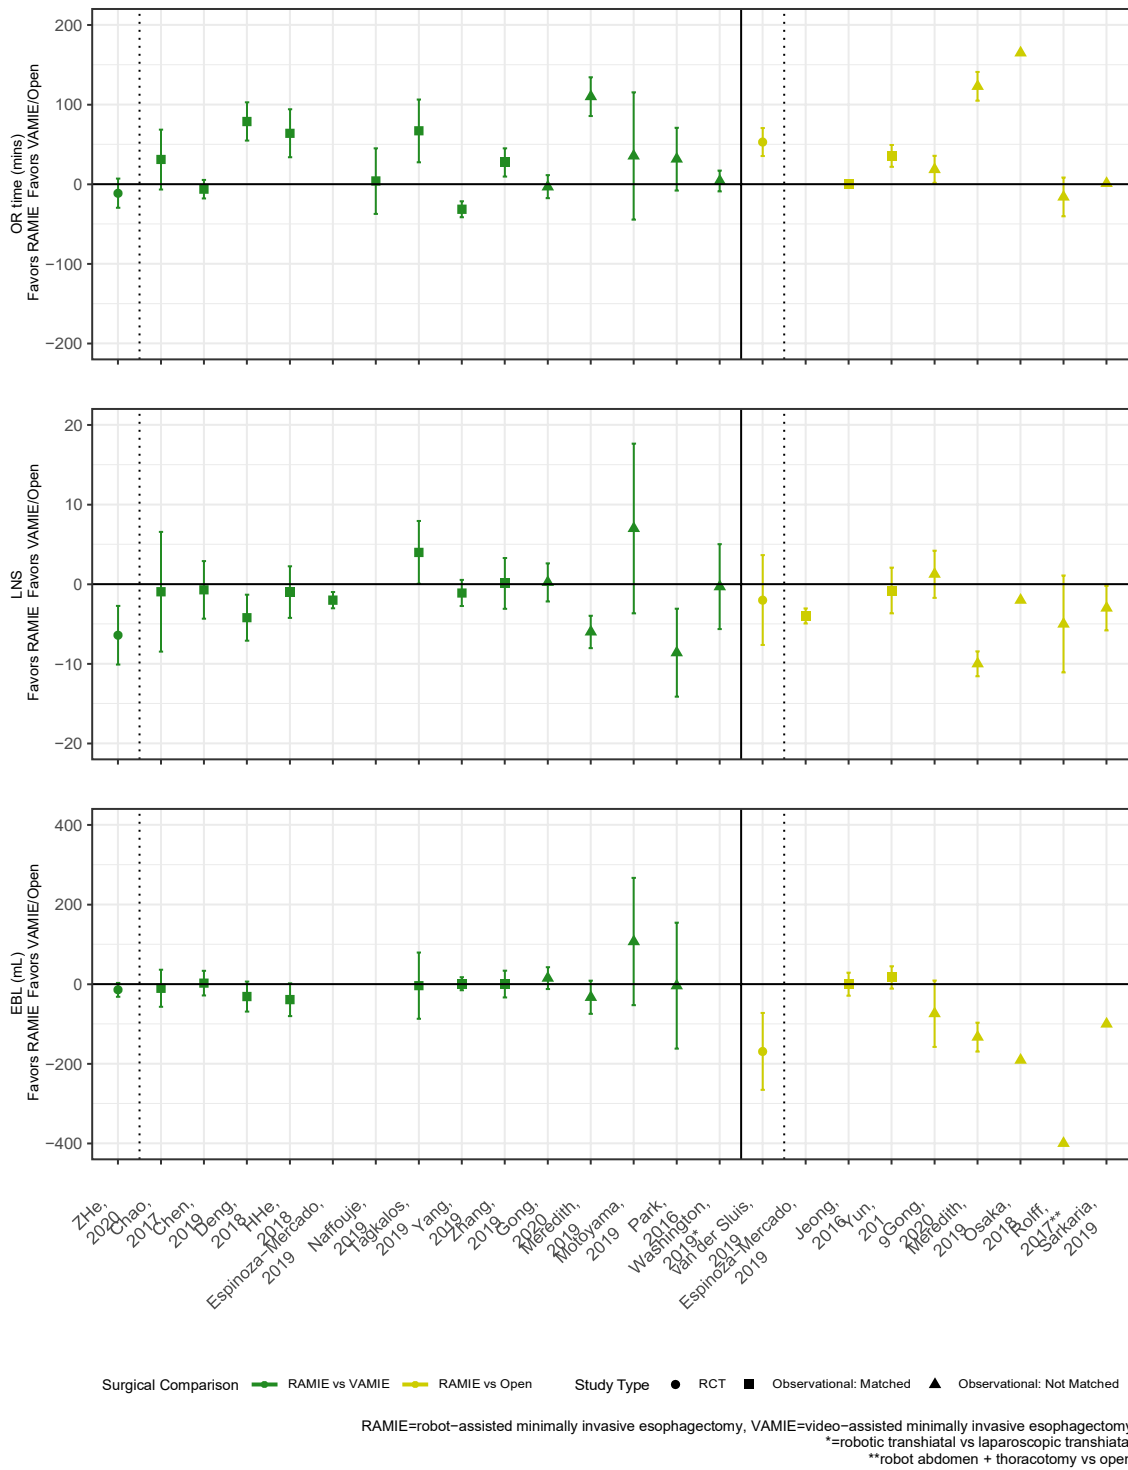

Dashed line: separates randomized trial from observational trials.  
 Solid line: separates RAMIE vs. VAMIE and RAMIE vs. open esophagectomy comparisons

**eFIGURE 2. Forest Plot of Short-term Outcomes**

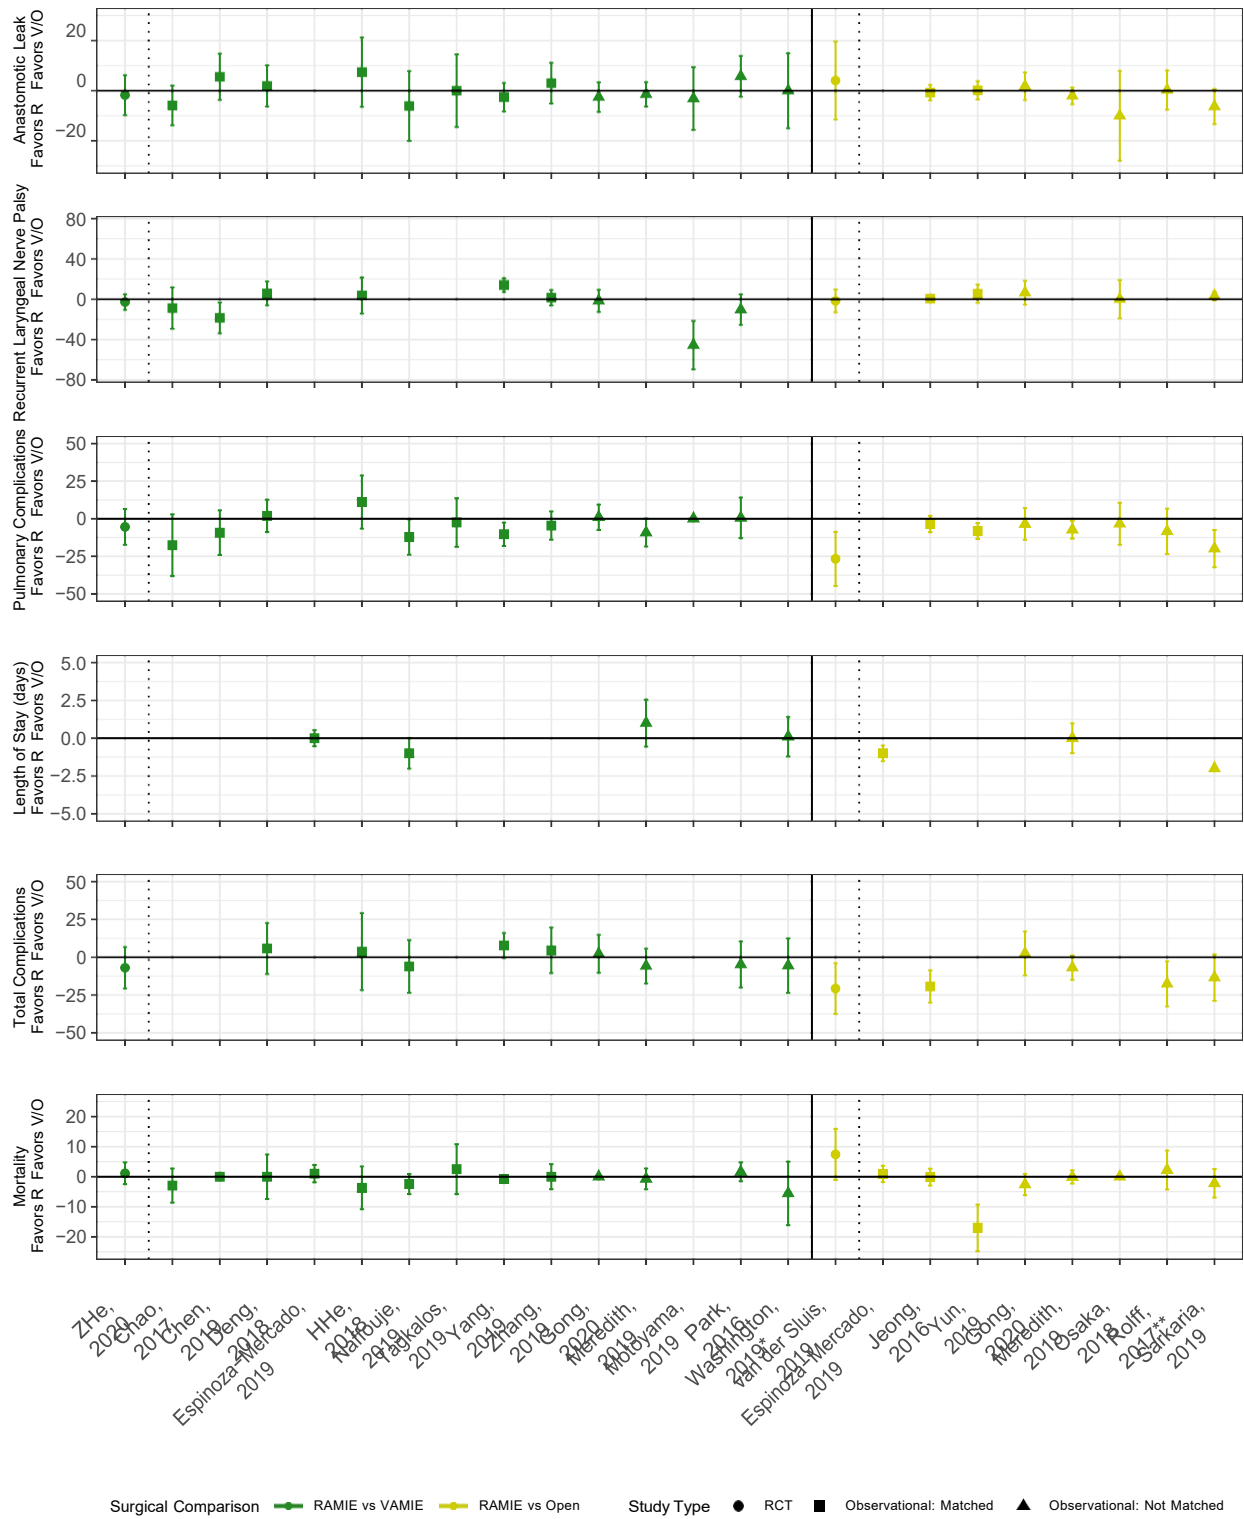

RAMIE(R)=RAMIE=robot-assisted minimally invasive esophagectomy, VAMIE(V)=video-assisted minimally invasive esophagectomy, O=Open  
 \*=robotic transhiatal vs laparoscopic transhiatal  
 \*\*robot abdomen + thoracotomy vs open

Dashed line: separates randomized trial from observational trials.

Solid line: separates RAMIE vs. VAMIE and RAMIE vs. open esophagectomy comparisons

**eFIGURE 3. Forest Plot of Long-Term Outcomes**

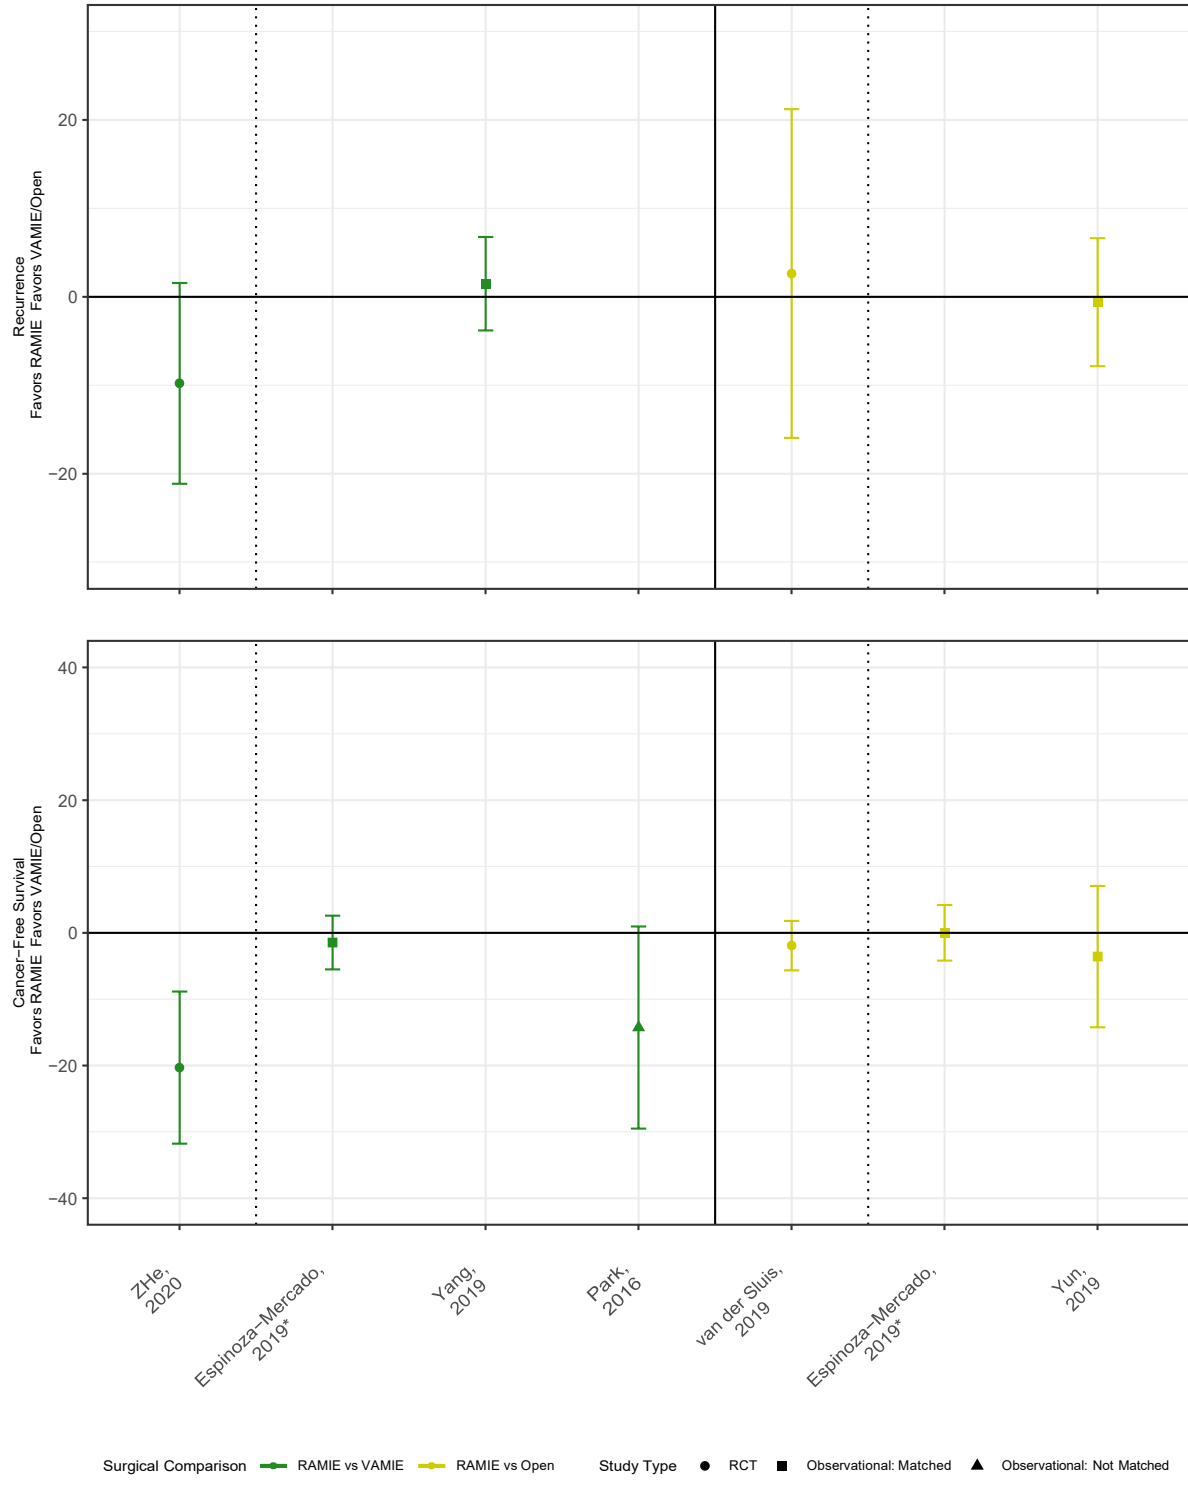

RAMIE=robot-assisted minimally invasive esophagectomy, VAMIE=video-assisted minimally invasive esophagectomy  
 \*overall survival

Dashed line: separates randomized trial from observational trials.

Solid line: separates RAMIE vs. VAMIE and RAMIE vs. open esophagectomy comparisons

## References:

1. Chao YK, Hsieh MJ, Liu YH, Liu HP. Lymph Node Evaluation in Robot-Assisted Versus Video-Assisted Thoracoscopic Esophagectomy for Esophageal Squamous Cell Carcinoma: A Propensity-Matched Analysis. *World J Surg.* 2018;42(2):590-598.
2. Chen J, Liu Q, Zhang X, et al. Comparisons of short-term outcomes between robot-assisted and thoraco-laparoscopic esophagectomy with extended two-field lymph node dissection for resectable thoracic esophageal squamous cell carcinoma. *J Thorac Dis.* 2019;11(9):3874-3880.
3. Deng HY, Luo J, Li SX, et al. Does robot-assisted minimally invasive esophagectomy really have the advantage of lymphadenectomy over video-assisted minimally invasive esophagectomy in treating esophageal squamous cell carcinoma? A propensity score-matched analysis based on short-term outcomes. *Dis Esophagus.* 2019;32(7).
4. Espinoza-Mercado F, Imai TA, Borgella JD, et al. Does the Approach Matter? Comparing Survival in Robotic, Minimally Invasive, and Open Esophagectomies. *Ann Thorac Surg.* 2019;107(2):378-385.
5. Gong L, Jiang H, Yue J, et al. Comparison of the short-term outcomes of robot-assisted minimally invasive, video-assisted minimally invasive, and open esophagectomy. *J Thorac Dis.* 2020;12(3):916-924.
6. He H, Wu Q, Wang Z, et al. Short-term outcomes of robot-assisted minimally invasive esophagectomy for esophageal cancer: a propensity score matched analysis. *J Cardiothorac Surg.* 2018;13(1):52.
7. He ZF, Zheng TL, Liu DL, et al. [Comparison of short-term and long-term efficacy between robot-assisted and thoracoscopy-laparoscopy-assisted radical esophageal cancer surgery]. *Zhonghua Wei Chang Wai Ke Za Zhi.* 2020;23(4):390-395.
8. Jeong DM, Kim JA, Ahn HJ, Yang M, Heo BY, Lee SH. Decreased Incidence of Postoperative Delirium in Robot-assisted Thoracoscopic Esophagectomy Compared With Open Transthoracic Esophagectomy. *Surg Laparosc Endosc Percutan Tech.* 2016;26(6):516-522.
9. Meredith KL, Maramara T, Blinn P, Lee D, Huston J, Shridhar R. Comparative Perioperative Outcomes by Esophagectomy Surgical Technique. *J Gastrointest Surg.* 2019.
10. Motoyama S, Sato Y, Wakita A, et al. Extensive Lymph Node Dissection Around the Left Laryngeal Nerve Achieved With Robot-assisted Thoracoscopic Esophagectomy. *Anticancer Res.* 2019;39(3):1337-1342.
11. Naffouje SA, Salloum RH, Khalaf Z, Salti GI. Outcomes of Open Versus Minimally Invasive Ivor-Lewis Esophagectomy for Cancer: A Propensity-Score Matched Analysis of NSQIP Database. *Ann Surg Oncol.* 2019;26(7):2001-2010.
12. Osaka Y, Tachibana S, Ota Y, et al. Usefulness of robot-assisted thoracoscopic esophagectomy. *Gen Thorac Cardiovasc Surg.* 2018;66(4):225-231.
13. Park S, Hwang Y, Lee HJ, Park IK, Kim YT, Kang CH. Comparison of robot-assisted esophagectomy and thoracoscopic esophagectomy in esophageal squamous cell carcinoma. *J Thorac Dis.* 2016;8(10):2853-2861.
14. HC. R, RB. A, M. B, et al. Robot-assisted hybrid esophagectomy is associated with a shorter length of stay compared to conventional transthoracic esophagectomy, a

- retrospective study. <http://www.who.int/trialssearch/Trial2.aspx?TrialID=DRKS00013023>. 2017.
15. Sarkaria IS, Rizk NP, Goldman DA, et al. Early Quality of Life Outcomes After Robotic-Assisted Minimally Invasive and Open Esophagectomy. *Ann Thorac Surg*. 2019;108(3):920-928.
  16. Tagkalos E, Goense L, Hoppe-Lotichius M, et al. Robot-assisted minimally invasive esophagectomy (RAMIE) compared to conventional minimally invasive esophagectomy (MIE) for esophageal cancer: a propensity-matched analysis. *Dis Esophagus*. 2019.
  17. van der Sluis PC, van der Horst S, May AM, et al. Robot-assisted Minimally Invasive Thoracoscopic Esophagectomy Versus Open Transthoracic Esophagectomy for Resectable Esophageal Cancer: A Randomized Controlled Trial. *Ann Surg*. 2019;269(4):621-630.
  18. Washington K, Watkins JR, Jay J, Jeyarajah DR. Oncologic Resection in Laparoscopic Versus Robotic Transhiatal Esophagectomy. *Jsls*. 2019;23(2).
  19. Yang Y, Zhang X, Li B, et al. Short- and mid-term outcomes of robotic versus thoracoscopic McKeown esophagectomy for squamous cell esophageal cancer: a propensity score-matched study. *Dis Esophagus*. 2019.
  20. Yun JK, Chong BK, Kim HJ, et al. Comparative outcomes of robot-assisted minimally invasive versus open esophagectomy in patients with esophageal squamous cell carcinoma: a propensity score-weighted analysis. *Dis Esophagus*. 2019.
  21. Zhang Y, Han Y, Gan Q, et al. Early Outcomes of Robot-Assisted Versus Thoracoscopic-Assisted Ivor Lewis Esophagectomy for Esophageal Cancer: A Propensity Score-Matched Study. *Ann Surg Oncol*. 2019;26(5):1284-1291.
